## **The MOV10 RNA helicase is a dosage-dependent host restriction factor for LINE1 retrotransposition in mice**

Yongjuan Guan<sup>1</sup>, Hongyan Gao<sup>2</sup>, N. Adrian Leu<sup>1</sup>, Anastassios Vourekas<sup>3</sup>, Panagiotis Alexiou<sup>3</sup>, Manolis  
5 Maragkakis<sup>3</sup>, Zissimos Mourelatos<sup>3</sup>, Guanxiang Liang<sup>2</sup>, and P. Jeremy Wang<sup>1,\*</sup>

<sup>1</sup>Department of Biomedical Sciences, University of Pennsylvania School of Veterinary Medicine, Philadelphia, PA 19104, USA.

<sup>2</sup>Center for Infectious Disease Research, School of Medicine, Tsinghua University, Beijing 100084,  
10 China.

<sup>3</sup>Department of Pathology and Laboratory Medicine, Perelman School of Medicine, University of Pennsylvania, Philadelphia, PA 19104, USA.

\*Author for correspondence ([pwang@vet.upenn.edu](mailto:pwang@vet.upenn.edu)).

## Abstract

Transposable elements constitute nearly half of the mammalian genome and play important roles in genome evolution. While a multitude of both transcriptional and post-transcriptional mechanisms exist to silence transposable elements, control of transposition *in vivo* remains poorly understood. MOV10, an RNA helicase, is a potent inhibitor of mobilization of retrotransposons and retroviruses in cell culture assays. Here we report that MOV10 restricts LINE1 retrotransposition in mice. Although MOV10 is broadly expressed, its loss causes only incomplete penetrance of embryonic lethality, and the surviving MOV10-deficient mice are healthy and fertile. Biochemically, MOV10 forms a complex with UPF1, a key component of the nonsense-mediated mRNA decay pathway, and primarily binds to the 3' UTR of somatically expressed transcripts in testis. Consequently, loss of MOV10 results in an altered transcriptome and a modest upregulation of two LINE1 families in testis. Analyses using a LINE1 reporter transgene reveal that loss of MOV10 leads to increased LINE1 retrotransposition in somatic and reproductive tissues from both embryos and adult mice. Moreover, the degree of LINE1 retrotransposition inhibition is dependent on the *Mov10* gene dosage. Furthermore, MOV10 deficiency reduces reproductive fitness over successive generations. Our findings demonstrate that MOV10 attenuates LINE1 retrotransposition in a dosage-dependent manner in mice.

## Author summary

Transposable elements (TEs), including L1 and SINEs, are abundant in the genome and play important roles in evolution, development, and diseases. While TEs propagate in individuals and across generations, the host organism needs to suppress them, resulting in an ongoing arms race between TEs and the host genome. L1, a retrotransposon, accounts for about 17% of the mammalian genome. L1 encodes two proteins, which bind to the L1 transcript to form L1 ribonucleoprotein particles. L1 proliferates in the genome via retrotransposition. A multitude of transcriptional and post-transcriptional mechanisms exist to suppress TEs, however, retrotransposition of TEs remains poorly understood. L1 ribonucleoprotein particles are associated with a large number of host proteins, one of which is the MOV10 RNA helicase. MOV10 exhibits anti-viral activities against retroviruses such as HIV-1. In cultured cells, MOV10 is a potent inhibitor of retrotransposition of L1, SINEs, and IAP. Although MOV10 is expressed in a broad range of tissues, loss of MOV10 causes only incomplete penetrance of embryonic lethality. The viable MOV10-deficient mice are grossly normal and fertile. Importantly, analyses using a L1 transgene reporter reveal that MOV10 inhibits L1 retrotransposition in both somatic tissues and reproductive tissues in a gene dosage-dependent manner. Therefore, MOV10 functions as a host restriction factor for L1 and possibly other transposable elements *in vivo*.

## 50 **Introduction**

Transposable elements (TEs) constitute ~40% of the mammalian genome. Despite sometimes being called “junk” DNA, TEs play important roles in genome evolution, development, and diseases [1-4]. TEs have an enormous capacity to amplify in the host genome. On one hand, integration of TEs into new genomic sites can change the level or pattern of neighboring gene expression or generate new genes, resulting in greater genetic diversity that could be beneficial to the host [2, 3]. On the other hand, genomic insertion can disrupt gene function and cause immediate harm to the host cell/organism. Indeed, many sporadic genetic diseases in animal species and humans are caused by transposon insertion [1]. While TEs exploit the host cellular machinery to propagate, the host in turn has evolved multiple mechanisms to suppress their mobilization to protect genome integrity [5]. The outcome of the ongoing arms race between the parasitic TEs and the host is particularly critical in the germline, where TE-induced genetic changes can impact fertility and the genetic integrity over subsequent generations.

Retrotransposons, including endogenous retroviruses, are the only known active TEs in mouse and human. While the vast majority of retrotransposons are truncated inactive copies, a subset of elements remains intact and are capable of transposition – the insertion of new copies at new genomic locations. LINE1 (long interspersed nuclear element-1; L1), SINEs (short interspersed nuclear elements), and LTR (Long terminal repeat) retrotransposons are active in mouse, while L1s, SINEs, and SVAs are active in human. L1 is the most abundant class of TEs in mammals, accounting for about 17% of the genome in mouse and human. It is estimated that up to 3000 copies of L1 in mouse [6] and ~100 copies of L1 in human are intact and active [7, 8].

L1 retrotransposons mobilize in the genome through a “copy and paste” mechanism using reverse transcription. The 6-kb full-length L1 element contains two open reading frames (ORF1 and ORF2). The L1 ORF1 protein is an RNA-binding protein that forms a trimer and possesses nucleic acid chaperone activity [9]. The ORF2 protein exhibits endonuclease and reverse transcriptase activities [10, 11]. ORF1 and ORF2 proteins bind the L1 mRNA transcript to form L1 ribonucleoprotein particles that are imported into the nucleus, resulting in possible integrations at new genomic locations. SINEs do not encode proteins and rely on L1-encoded ORF2 protein for retrotransposition [12, 13]. Reverse transcription of L1 and SINE RNAs is primed by ORF2-nicked DNA in a process called target primed reverse transcription. Subsequently host-encoded DNA repair enzymes complete the integration reaction.

The host has evolved multiple mechanisms to inhibit retrotransposons to protect genome integrity, including DNA methylation [14, 15], histone modifications [16, 17], and small-non-coding RNAs such as piRNAs [18-20]. L1 contains a 5' untranslated region (5' UTR) that functions as its promoter. Normally, L1 is methylated at the CpG dinucleotides in its promoter and thus transcriptionally silenced. We

previously identified MOV10L1, an RNA helicase specifically expressed in mouse germ cells, as a critical regulator of retrotransposons [21, 22]. MOV10L1 interacts with all three mouse Piwi proteins and is required for biogenesis of all piRNAs [22-24]. Mechanistically, MOV10L1 binds directly to piRNA precursors to initiate piRNA biogenesis and its RNA helicase activity is required for this process [25-27]. piRNAs post-transcriptionally degrade L1 transcripts through Piwi proteins and transcriptionally silences active L1 transposons through de novo methylation of L1 promoters in the germline [20]. Inactivation of piRNA biogenesis factors such as MOV10L1 and Piwi proteins leads to de-silencing of retrotransposons in germ cells, meiotic arrest, and male infertility in mice.

Genetic studies have identified a large number of genes that are important for retrotransposon silencing in the germline [5]. Most of these genes function in the piRNA and DNA methylation pathways. These factors suppress transcription of retrotransposons and/or cause post-transcriptional degradation of retrotransposon transcripts. However, upregulation of retrotransposon transcripts does not necessarily lead to a proportional increase in new retrotransposition, suggesting that additional host factors block retrotransposition. Notably, proteomic studies have identified several dozens of cellular proteins that are associated with L1 ribonucleoprotein particles [28, 29], one of which is MOV10 (Moloney leukemia virus 10), a homologue of MOV10L1. While MOV10L1 is germ cell-specific, MOV10 is widely expressed. MOV10 is also an RNA helicase [30]. MOV10 plays a role in host defense against retroviruses and inhibits the activity of retroviruses such as HIV-1 at multiple stages [31-34]. Notably, MOV10 is known to inhibit retrotransposition of L1, SINE, and IAP retrotransposons in cell culture-based assays [35-38]. MOV10 interacts with RNASEH2, a nuclear ribonuclease, which hydrolyzes the RNA strands of L1-specific RNA-DNA hybrids in a MOV10-dependent manner [39]. MOV10 cooperates with two terminal uridytransferases, TUT4 and TUT7, to promote uridylation of human L1 mRNA to destabilize it and inhibit its reverse transcription [40]. While these studies have provided important insights into the role of MOV10 in preventing L1 retrotransposition in cultured cells, it has not been studied in intact host organisms and here we report its physiological function in mice. We find that loss of MOV10 causes partial embryonic lethality. Using a L1 reporter transgene, we demonstrate that MOV10 is a potent host restriction factor for L1 retrotransposition in both somatic cells and germ cells in mice.

## RESULTS

### Loss of MOV10 causes embryonic lethality with incomplete penetrance

In adult mice, the MOV10 protein is highly expressed in several tissues including testis, ovary, kidney, spleen, and liver, present at a low level in lung, but not detected in brain, heart, and muscle (Fig 1A). In

HEK293T cells, MOV10 is associated with UPF1, a key component of the nonsense-mediated mRNA decay pathway [30]. Similar to MOV10, UPF1 is also abundantly expressed in multiple adult tissues but not heart and muscle (Fig 1A).

To identify MOV10-associated proteins in tissues, we performed immunoprecipitation of mouse  
120 testicular extracts with anti-MOV10 antibody. Both the putative MOV10 band and extra bands in the immunoprecipitated proteins were subjected to mass spectrometry for protein identification (S1A Fig). In addition to the identification of MOV10, one associated protein was identified as UPF1 (S1A Fig). The association of MOV10 and UPF1 in testis was confirmed by co-immunoprecipitations and Western blot analyses (S1B-C Fig), showing that, as in human HEK293T cells, MOV10 forms a complex with UPF1 in  
125 mouse tissues.

Because of the high abundance of MOV10 in testis, we examined its expression in developing testes and found that the MOV10 abundance was constant in testes from postnatal day 6 (P6) to P56 (adulthood) (S2A Fig). Western blot analysis using fractionated testicular extracts showed that MOV10 was cytoplasmic (Fig 1B). Immunofluorescence of MOV10 in frozen sections from embryonic 16.5  
130 (E16.5), P0, and 8-week-old testes showed that MOV10 was highly expressed in the cytoplasm of Sertoli cells, gonocytes, spermatogonia, leptotene and zygotene spermatocytes, but present at a low level in pachytene spermatocytes and not detected in spermatids (S2B Fig). In the adult ovary, MOV10 was abundant in granulosa cells but not in oocytes (S2B Fig). These results demonstrate that MOV10 is a broadly expressed cytoplasmic protein in testis and ovary.

As its relatively ubiquitous expression suggests that conventional knockout of *Mov10* could be embryonic lethal, we generated a *Mov10* conditional (floxed) allele (referred to as *Mov10<sup>fl</sup>*) through gene targeting in embryonic stem (ES) cells by homologous recombination (S3 Fig). MOV10 has two RNA  
135 helicase domains at its C-terminal half: the DEXXQ/H-box helicase domain of Helz-like helicases and the C-terminal helicase domain of UPF1-like family helicases (S3A Fig). Cre-mediated deletion of floxed  
140 exons 8-14 deletes the first RNA helicase domain and causes a frame shift in the mutant transcript (S3B Fig). We used *Ddx4*-Cre and *Amh*-Cre to inactivate *Mov10* in germ cells and gonadal somatic cells respectively. *Ddx4*-Cre (also called Vasa-Cre) expression begins in germ cells at embryonic day 15 in both sexes [41]. *Amh* (anti-Mullerian hormone)-Cre is specifically expressed in Sertoli cells in testis and granulosa cells in ovary [42]. Immunofluorescence analysis revealed that, as expected, MOV10 was  
145 absent in germ cells but present in Sertoli cells in *Mov10<sup>fl/-</sup> Ddx4*-Cre testis, whereas MOV10 showed the opposite expression pattern in *Mov10<sup>fl/fl</sup> Amh*-Cre testis (S3C Fig). However, to our surprise, both *Mov10<sup>fl/-</sup> Ddx4*-Cre and *Mov10<sup>fl/fl</sup> Amh*-Cre conditional knockout mice were fertile.

We next used the ubiquitously expressed *Actb*-Cre to generate *Mov10* global knockout mice. *Actb*-Cre is under the control of the strong  $\beta$ -actin promoter [43]. Strikingly, intercross of *Mov10*<sup>+/-</sup> mice produced viable *Mov10*<sup>-/-</sup> (global knockout) offspring but at a reduced frequency, suggesting that *Mov10* deficiency causes partial embryonic lethality (Fig 1D). At E16.5, only one live *Mov10*<sup>-/-</sup> embryo was observed, confirming the partial lethality phenotype (Fig 1D). Our *Mov10* mutant mice are on a mixed genetic background (129 x C57BL/6 x FVB), possibly influencing penetrance. Histology of *Mov10*<sup>-/-</sup> testis and ovary did not reveal obvious defects. Western blot analysis showed that the MOV10 protein was reduced in *Mov10*<sup>+/-</sup> testis and absent in *Mov10*<sup>-/-</sup> testis (Fig 1C). In addition, MOV10 was absent in the *Mov10*<sup>-/-</sup> testis by immunofluorescence, demonstrating that the knockout allele is null (S3C Fig). Strikingly, the surviving *Mov10*<sup>-/-</sup> mice were grossly normal and fertile. These results demonstrate that MOV10 is important for embryogenesis but that the penetrance of lethality caused by loss of MOV10 is incomplete.

### **MOV10 binds preferentially to somatic transcripts and 3' UTRs in testis**

Because MOV10 is an RNA-binding protein [30], we sought to identify its RNA targets in wild type P21 testis. We performed high-throughput sequencing after cross-linking and immunoprecipitation (HITS-CLIP or CLIP-seq) (Fig 2A) [44]. Autoradiography after CLIP revealed specific MOV10-RNA protein complexes in the testis (Fig 2B). We extracted RNA from the main radioactive signal band and constructed cDNA libraries for sequencing. The fold enrichment in CLIP-seq data was calculated by normalization using the P21 testis RNA-seq data. Our analysis showed that 2305 transcripts were highly bound by MOV10 (fold enrichment > 10), and 7174 transcripts moderately bound by MOV10 (1 < fold enrichment < 10, S1 Table). Quantifying the distribution of MOV10 CLIP tags showed that they were highly enriched in the 3' UTRs relative to transcript coding regions (Fig 2C). However, we noticed an inverse relationship between MOV10-binding and transcript expression level in testis (Fig 2D), with highly bound transcripts expressed at low levels in testis, while those that were weakly bound by MOV10 were more highly expressed.

We next examined the expression of MOV10-bound transcripts in mouse somatic tissues by re-analyzing the RNA-seq data from these tissues (Fig 2D) [45-50]. We found that the transcripts highly bound by MOV10 in testis were highly expressed in somatic tissues, particularly in brain (Fig 2D and 2E), while those weakly bound by MOV10 in testis were highly expressed in testis (Fig 2D and 2F). These results raised the intriguing possibility that MOV10 specifically modulates the testis transcriptome by binding to and degrading somatically expressed transcripts in the testis.

## Altered transcriptome in *Mov10*-deficient testis

To determine the effect of loss of MOV10 on the testicular transcriptome, we performed RNA-seq analysis of testes from P21 *Mov10*<sup>+/+</sup> and *Mov10*<sup>-/-</sup> mice. Using the cutoff (Fold change > 2, FDR < 0.05, RPM > 1 in at least half of libraries), we found 926 down-regulated protein-coding genes and 60  
185 upregulated protein-coding genes in *Mov10*<sup>-/-</sup> testes (Fig 3A and S2 Table). Notably, the upregulated genes in *Mov10*<sup>-/-</sup> testes were highly expressed in somatic tissues, such as retina, hippocampus, and liver (Fig 3B). However, the downregulated genes in *Mov10*<sup>-/-</sup> testes were strongly expressed in the testis in comparison with somatic tissues (Fig 3C). We then performed correlation analysis between MOV10-binding (CLIP-seq) and the differential gene expression in *Mov10*<sup>-/-</sup> testis. Twenty transcripts were  
190 strongly bound by MOV10 and significantly downregulated in *Mov10*<sup>-/-</sup> testis (Fig 3D). The enrichment of the MOV10 CLIP tags in testis was positively correlated with the expression fold change (*Mov10*<sup>-/-</sup> / *Mov10*<sup>+/+</sup>) in *Mov10*<sup>-/-</sup> testis (Fig 3D). These results suggest that MOV10 binding leads to degradation of its target transcripts in testis.

MOV10 was reported to decrease the level of L1 transcripts in somatic cell lines [36, 38].  
195 Therefore, we examined whether L1 transcripts were affected in *Mov10*-deficient mouse testis. Our analysis showed that although the overall abundance of L1 transcripts was not changed in *Mov10*-deficient testis in comparison with wild type controls (Fig 3E), the expression of two families of L1 elements was upregulated in *Mov10*<sup>-/-</sup> testis: L1Md\_F2 and L1Md\_T (Fig 3F). In contrast with the L1 elements, several SINE and ERV families showed reduced expression in *Mov10*<sup>-/-</sup> testis (Fig 3F). These  
200 results suggest that MOV10 regulates transcript abundance of a subset of L1, SINE, and LTR transposable elements in mouse testis.

## MOV10 inhibits L1 retrotransposition in mice

MOV10 inhibits retrotransposition of L1, SINE, and IAP retrotransposons in cell culture-based  
205 retrotransposition assays [35, 36, 38, 39, 51], suggesting that it may act as a host restriction factor for retrotransposons *in vivo*. As endogenous L1 elements are highly repetitive, it is difficult to distinguish new L1s from preexisting L1s. Therefore, we used an L1 reporter transgene, referred to as L1<sup>tg</sup> [52]. This L1 transgene has several key features: 1) its transcription is under the control of an endogenous mouse L1 promoter, which is methylated and thus repressed *in vivo*; 2) its two ORFs are codon-optimized to  
210 maximize translation; 3) it contains an intron in the disrupted GFP cassette in its 3' UTR that serves as an indicator of retrotransposition; and 4) the transgene is single copy (inserted in the first intron of the *Tnr1* gene on Chr. 1) (Fig 4A) [52]. As the intron is expected to be spliced out following transcription, new L1

insertions should lack the intron and thus can be distinguished from the donor L1 transgene. The promoter of this L1<sup>tg</sup> transgene is methylated and thus repressed *in vivo* [52].

215 To trace new L1 insertions in the genome, we introduced this L1<sup>tg</sup> reporter transgene into our *Mov10*<sup>-/-</sup> mice. Intron-flanking PCR of genomic DNA identified new L1 copies in a subset of tissues from E18.5 embryos and 8-week-old *Mov10*<sup>-/-</sup> L1<sup>tg/tg</sup> mice (Fig 4B). Sequencing of the PCR bands confirmed that the new L1 insertions lacked the intron and thus originated from retrotransposition.

220 To compare the L1 insertion frequency in different tissues, we examined a total of 80 tissues from 10 *Mov10*<sup>-/-</sup> L1<sup>tg/tg</sup> embryos (5 males and 5 females; 8 tissues per embryo) at E18.5 and detected new L1 copies in all tissues, with higher insertion frequencies in spleen, ovary, liver, and kidney, but relatively lower insertion frequencies in lung, brain, and heart (Fig 4C). We then analyzed 224 tissues from 8-week-old *Mov10*<sup>-/-</sup> L1<sup>tg/tg</sup> mice (14 males and 14 females; 8 tissues per mouse) and found higher L1 insertion frequencies in spleen and kidney but lower frequencies in lung, brain, and heart (Fig 4C). MOV10 protein abundance was high in liver, kidney, and spleen (Fig 1A). These results showed that the new L1 insertion frequency in embryonic and adult *Mov10*<sup>-/-</sup> tissues correlated with the MOV10 protein abundance in wild type tissues. In addition, the L1 insertion frequencies were similar between E18.5 tissues and adult tissues, indicating that the L1 insertion frequency in *Mov10*<sup>-/-</sup> tissues is likely to be age-independent (Fig 4C).

230 To further test whether MOV10 functions as a factor restricting retrotransposition, we analyzed testis, epididymal sperm, and somatic tissues from *Mov10*<sup>+/+</sup> L1<sup>tg/tg</sup>, *Mov10*<sup>+/-</sup> L1<sup>tg/tg</sup>, and *Mov10*<sup>-/-</sup> L1<sup>tg/tg</sup> mice. We made several observations. First, new L1 insertions were rare but detectable in 10% of lung, heart, and sperm samples from the *Mov10*<sup>+/+</sup> L1<sup>tg/tg</sup> mice (Fig 4D). Second, compared with *Mov10*<sup>+/+</sup> L1<sup>tg/tg</sup> and *Mov10*<sup>+/-</sup> L1<sup>tg/tg</sup> mice, new L1 insertions in *Mov10*<sup>-/-</sup> L1<sup>tg/tg</sup> mice were increased, with the highest insertion frequencies in kidney, spleen, and liver (Fig 4D-E). Third, the new L1 insertion frequency was higher in tissues from *Mov10*<sup>+/-</sup> L1<sup>tg/tg</sup> mice than those from *Mov10*<sup>+/+</sup> L1<sup>tg/tg</sup> mice (Fig 4D-E), indicating that MOV10 inhibits L1 retrotransposition in a dosage-dependent manner. Fourth, L1 insertions were also detected in epididymal sperm, suggesting that these L1 insertions might be germline transmissible (Fig 4D). All these data support that MOV10 is a dosage-dependent inhibitor of L1 retrotransposition in both reproductive and somatic tissues in mice.

240 To determine if L1 insertion is germline transmissible, we analyzed new L1 insertions in tail genomic DNA of 101 offspring from the mating of *Mov10*<sup>-/-</sup> L1<sup>tg/tg</sup> males with *Mov10*<sup>-/-</sup> L1<sup>tg/tg</sup> females, and detected new L1 insertions in 11 pups (Fig 4F). We then examined the offspring from matings of *Mov10*<sup>-/-</sup> L1<sup>tg/tg</sup> males or females with wild type mice to distinguish male from female germline transmissions. Out of 63 offspring from the mating of *Mov10*<sup>-/-</sup> L1<sup>tg/tg</sup> males with *Mov10*<sup>+/+</sup> females, a new



L1 insertion was detected in the tail of only one pup (Fig 4F). Out of 99 offspring from the mating of *Mov10*<sup>-/-</sup> L1<sup>tg/tg</sup> females with *Mov10*<sup>+/+</sup> males, new L1 insertions were detected in the tails of 7 pups (Fig 4F). However, we examined seven tissues (lung, kidney, brain, spleen, heart, liver, and testis or ovary) from 9 pups with L1 insertion-positive tails, and only one pup (from the *Mov10*<sup>-/-</sup> L1<sup>tg/tg</sup> intercross) had L1 insertions in all tissues examined. These results suggest that most L1 insertions detected in tail were not germline-transmitted but rather reflected new L1 insertions that occurred only in the tail.

### **Impact of MOV10 deficiency on reproductive fitness over multiple generations**

To test whether MOV10 deficiency affects reproductive fitness over multiple generations, we intercrossed *Mov10*<sup>+/-</sup> mice (G0) to obtain *Mov10*<sup>-/-</sup> mice (G1), which were then intercrossed to produce G2 *Mov10*<sup>-/-</sup> mice. Successive intercrosses were made until the sixth generation (G6) (Fig 5A). Three males from each generation were analyzed for testis weight, sperm count, testis histology, and litter size. The data from *Mov10*<sup>+/-</sup> mice (G0) served as the control. G1 *Mov10*<sup>-/-</sup> mice displayed similar parameters such as testis weight and sperm count as *Mov10*<sup>+/-</sup> mice (G0) (Fig 5B-G). However, G2 *Mov10*<sup>-/-</sup> mice exhibited significant reductions in testis weight, sperm count, and the percentage of abnormal seminiferous tubules (Fig 5B-D). The percentage of Sertoli cell-only tubules and litter size of G2 mice were similar with G0 mice (Fig 5E-F). G3 *Mov10*<sup>-/-</sup> mice showed further reduction in the testis weight and sperm count, and further increase in the percentage of abnormal tubules (Fig 5B-D). The litter size of the mice decreased from 5.8 at G0 to 3.8 at G3, but the decrease did not reach statistical significance ( $p = 0.10$ , Fig 5F). These results showed that while the reproductive fitness of *Mov10*<sup>-/-</sup> mice decreased from G1 to G3, it did not continue to exacerbate in *Mov10*<sup>-/-</sup> mice beyond G3. Although the *Mov10*<sup>-/-</sup> mice from G4 to G6 still showed smaller testis, reduced sperm count, and defective spermatogenesis, the defects were less severe than in G3 mice (Fig 5B-G). These results show that reproductive fitness of *Mov10*<sup>-/-</sup> mice worsens progressively until the third generation but recovers to a limited extent in later generations.

### **DISCUSSION**

While a multitude of transcriptional and post-transcriptional mechanisms exist to silence TEs, control of transposition *in vivo* remains poorly understood. Based on findings from this and previous studies, we propose a unifying model for the function of two homologous RNA helicases, MOV10 and MOV10L1, in suppression of retrotransposons in mouse. As both MOV10 and MOV10L1 are conserved in vertebrates including humans, we expect this model to be applicable to all vertebrates. Despite their sequence homology, our results show that MOV10 and MOV10L1 play distinct roles in control of retrotransposons (Fig 6). Previous studies revealed that MOV10L1 is essential for piRNA biogenesis [22, 23, 25-27, 53].

280 piRNAs orchestrate both post-transcriptional Piwi protein-dependent degradation of L1 transcripts and transcriptional silencing of active L1 transposons through de novo methylation of L1 promoters (Fig 6). In the absence of MOV10L1, we have shown that L1 is highly upregulated in male germ cells [22] and a study using the L1<sup>tg</sup> reporter assay has shown that loss of MOV10L1 leads to increased L1 retrotransposition in mouse germ cells [52].

285 In contrast to the germline-specific expression pattern of MOV10L1, MOV10 is expressed ubiquitously, and in cultured somatic cells, MOV10 strongly inhibits retrotransposition [35-38]. Here, we have demonstrated that MOV10 is a potent inhibitor of L1 retrotransposition in mouse (*in vivo*). MOV10 regulates L1 retrotransposition through several mechanisms. First, MOV10 directly binds to a large number of transcripts including the L1 mRNA [30, 54]. Our MOV10 CLIP-seq revealed that MOV10 preferentially binds to 3' UTRs of transcripts in testis (Fig 2). MOV10 forms a complex with UPF1, an integral component of the NMD pathway, in HEK293T cells [30]. Our study further confirmed the interaction between MOV10 and UPF1 in mouse testis (S1 Fig). Therefore, MOV10 and UPF1 may target L1 mRNA for degradation. Loss of MOV10 caused upregulation of two L1 families but did not change the overall level of L1 transcripts in mouse testis. In addition, MOV10 sequesters L1 ribonucleoprotein particles in the cytosolic aggregates [55]. Second, MOV10 interacts with L1-encoded ORF2 and recombinant MOV10 blocks reverse transcription *in vitro* [51]. In addition, MOV10 interacts with TUT7 uridylyltransferase. Uridylation of L1 3' end inhibits initiation of reverse transcription [40]. Third, MOV10 interacts with RNASEH2 to degrade L1 mRNA in RNA-DNA hybrids. Knockdown of MOV10 or RNASEH2 in cells leads to accumulation of L1-specific RNA-DNA hybrids [39]. Lastly, since MOV10 is associated with L1 ribonucleic particles in cultured cells [28, 29], it could inhibit L1 mobilization by interaction with additional proteins present in the particles. Thus MOV10 likely inhibits LINE1 retrotransposition by multiple mechanisms.

305 In contrast with the presence of two related RNA helicases (MOV10 and MOV10L1) in vertebrates, *Drosophila* has only one homologous RNA helicase – Armitage, which functions in both the RNAi and piRNA pathways [56, 57]. The RNA helicase activity is essential for retrotransposon control by both MOV10 and MOV10L1 [25, 26, 36]. In vertebrates, *Mov10* is likely to be the ancestral gene, because it is broadly expressed and inhibits retroviruses such as HIV-1, thus serving as an ancient innate anti-viral response. *Mov10l1* likely arose through gene duplication of *Mov10* and evolved to be germ cell-specific [21, 58] to protect the genome integrity within the germ line from TEs throughout the vertebrate genome. The functional specialization of MOV10L1 with the piRNA pathway, which most likely emerged later during evolution to deal with endogenous transposons, permitted generation of retrotransposon-specific piRNAs to mediate their targeted destruction, thus serving as a “de facto”

adaptive anti-viral response to protect against retrotransposon mobilization. Thus, vertebrate MOV10 and MOV10L1 repress retrotransposons but by divergent mechanisms - inhibition of retrotransposition (MOV10) and production of piRNAs (MOV10L1) (Fig 6).

315 While a previous study reported that inactivation of *Mov10* was completely embryonic lethal [51], in our study, the global knockout of *Mov10* caused only partial embryonic lethality and the surviving *Mov10*<sup>-/-</sup> mice were grossly normal and fertile. The difference in the viability of *Mov10*-deficient mice/embryos could potentially be attributed to genetic backgrounds. Our mice were on a hybrid genetic background (129 x C57BL/6 x Fvb) and survived, possibly due to hybrid vigor. However, the genetic  
320 background of the mice in the Skariah study was not reported [51]. Another possible explanation could lie in the difference of the knockout strategies. In the Skariah study, a gene trap *Mov10* mutant allele was used, whereas exons 8-14 of *Mov10* were deleted in our study (S3B Fig).

MOV10 is expressed in developing but not adult brain [51]. L1 is active in developing brain (mainly in hippocampus) and generates somatic mosaicism in neuronal progenitor cells [59]. We observed  
325 higher frequencies of new L1 insertions in all tissues including brain from *Mov10*<sup>-/-</sup> L1<sup>tg/tg</sup> mice. In addition, we observed elevated levels of new L1 insertions in tissues from *Mov10*<sup>+/-</sup> L1<sup>tg/tg</sup> mice in comparison with *Mov10*<sup>+/+</sup> L1<sup>tg/tg</sup> mice. Consistent with our results, Skariah *et al* reported that the L1 genomic content was higher in the *Mov10* heterozygous brain than the wild type [51]. These findings further support that MOV10 is a dosage-dependent inhibitor of L1 retrotransposition and suggests that the  
330 somatic mosaicism of L1 in neuronal progenitor cells may reflect cell-specific expression levels of MOV10. Such findings have broad implications, as it suggests that vertebrates including humans, with only one functional *Mov10* allele, may experience increased retrotransposition of TEs, potentially increasing the number of pathogenic TE insertions.

Despite increased retrotransposition, the surviving *Mov10*<sup>-/-</sup> mice were fertile. It is possible that  
335 most retrotransposition events occur in non-coding genomic regions or disrupt genes in a heterozygous manner. However, as these retrotransposition-mediated mutations accumulate over multiple generations or become homozygous, defects are expected to develop in later generations. Indeed, *Mov10*<sup>-/-</sup> mice exhibited decreased testis weight, reduced sperm count, and increased defects in testicular histology over generations, with the most severe defects in the third generation. However, the fertility parameters did not  
340 continue to worsen beyond the third generation, possibly because gametes with a high load of insertions/mutations were selected against over multiple generations. In addition, MOV10 may regulate biological processes in addition to retrotransposition given that MOV10 binds to a large number of protein-coding transcripts.

MOV10 inhibits retrotransposition of not just L1 but also SINE, and IAP retrotransposons in cell  
345 culture-based assays [35-38], raising the possibility that it may act as a host restriction factor for all active  
TEs *in vivo*. The mouse genome harbors ~3000 intact L1 elements. The mouse genome also contains the  
intracisternal A-particle (IAP) element, an active rodent LTR retrotransposon that is absent in human.  
SINEs are non-coding elements and hitchhike on L1-encoded proteins for retrotransposition [12, 13]. In  
this study, we tracked the generation of new L1 insertions in tissues from *Mov10*<sup>+/-</sup> and *Mov10*<sup>-/-</sup> mice  
350 using the L1 reporter transgene. Given the abundance of endogenous retrotransposons, the increase in new  
insertions derived from the single-copy L1 reporter in *Mov10*<sup>+/-</sup> and *Mov10*<sup>-/-</sup> mice could be only the tip of  
an iceberg in the mobilization landscape of endogenous retrotransposons (L1, SINE, and IAP) in *Mov10*  
mutant mice.

## 355 **Materials and methods**

### **Ethics statement**

Mice were maintained and used for experimentation according to the guidelines of the Institutional Animal Care and Use Committees of the University of Pennsylvania under protocol# 806616.

360

### **Targeted inactivation of the *Mov10* gene**

In the *Mov10* targeting construct, a 2.3-kb genomic DNA segment harboring exons 8–14 was flanked by loxP sites (S3B Fig). The two homologous arms (2.3 kb and 1.95 kb) were amplified from a *Mov10*-containing BAC clone (RP24-503L4) by PCR with high-fidelity DNA polymerase. The HyTK selection cassette was cloned before the right arm. V6.5 ES cells were electroporated with the linearized targeting construct, cultured in the presence of hygromycin B (120 µg/ml, Invitrogen), and screened by long-  
365 distance PCR for homologously targeted *Mov10*<sup>3lox</sup> clones. Two *Mov10*<sup>3lox</sup> ES cell lines were electroporated with the pOG231 plasmid that expresses the Cre recombinase. ES cells were subjected to negative selection with gancyclovir (2 µM; Sigma) for removal of the HyTK cassette. ES cell colonies  
370 were screened by PCR. Recombination between the immediate HyTK-flanking loxP sites resulted in the *Mov10*<sup>fl</sup> allele (S3B Fig). Two *Mov10*<sup>fl</sup> ES cell lines were injected into B6C3F1 (Taconic) blastocysts that were subsequently transferred to the uteri of pseudopregnant ICR females. The *Mov10*<sup>fl</sup> allele was transmitted through the germline from chimeric males. *Actb*-Cre mice were used to generate *Mov10* mutant allele [43]. The *Ddx4*-Cre (240 bp) was genotyped with primers  
375 CACGTGCAGCCGTTTAAGCCGCGT and TTCCATTCTAAACAACACCCTGAA. The *Amh*-Cre transgene (305 bp) was genotyped with primers GCATTACCGGTCGATGCAACGAGTG and GAACGCTAGAGCCTGTTTTGCACGTTC. Intercrosses of *Mov10*<sup>+/-</sup> mice were used to generate *Mov10*<sup>-/-</sup> mice. The *Mov10* wild type allele (325 bp) was assayed with primers  
380 ATCGCCACTAGCCCTGAAGCAT and GCCGCATAGAACTTAGATCCATCC. The *Mov10*<sup>-</sup> (knockout) allele (315 bp) was assayed by PCR with primers GCGGTTGTTACAAGAAGGAGTTCTCA and GCCGCATAGAACT-TAGATCCATCC.

### **Genotyping of L1 5' UTR-ORFeus transgene mice**

The L1 5' UTR-ORFeus transgene (L1<sup>tg</sup>) was produced before [52]. The L1 transgene maps to the first  
385 intron of the *Tnr1* gene. The wild type (*Tnr1*) allele (356 bp) was genotyped with ACTGAGTGACCTCGGGTATATTTTC and CTGCTGAGCTGTTGTAACCTCCTT. The L1 transgene allele (156 bp) was assayed with CGGGCCATTTACCGTAAGTTATGT and

CTGCATTCTAGTTGTGGTTTGTCCA. The L1 transgene was introduced into *Mov10*-deficient background by breeding. The parental L1<sup>tg</sup> allele (1401 bp) and new L1<sup>tg</sup>-derived insertions (500 bp) were  
390 genotyped with intron-flanking primers ACCCAACACCCGTGCGTTTTATT and TGGAGTACAACACTACAACAGCCACAACGTCT (P1 and P2, Fig 4A).

### **Histological and immunofluorescence analyses**

For histological analysis, testes were fixed in Bouin's solution at room temperature overnight, embedded  
395 with paraffin and then sectioned at 5  $\mu$ m. Sections were stained with hematoxylin and eosin. As for immunofluorescence analysis, testes were fixed in 4% paraformaldehyde (in 1 $\times$ PBS) for 6 hours at 4°C, dehydrated in 30% sucrose (in 1 $\times$ PBS) overnight and sectioned at 5  $\mu$ m. The primary and secondary antibodies used for immunofluorescence analyses were listed in S3 Table.

### **Immunoprecipitation, mass spectrometry, and Western blotting analyses**

For immunoprecipitation (IP), 100 mg P21 testes were lysed in 1 ml RIPA buffer (10 mM Tris, pH 8.0, 140 mM NaCl, 1% Trion X-100, 0.1% sodium deoxycholate, 0.1% SDS, 1 mM EDTA) supplemented with 1 mM PMSF. Cell lysates were centrifuged by 16,000 g for 30 min at 4°C, and 1.5% of the supernatant was set aside as input. The remaining lysates were pre-cleared with 30  $\mu$ l protein G  
405 Dynabeads (Thermo Fisher Scientific) for two hours, and then incubated with 3  $\mu$ g MOV10 antibody (A301-571A, Bethyl lab) or UPF1 antibody (A301-902A, Bethyl lab) or normal rabbit IgG (2729, Cell Signaling) at 4°C for 1 hour. The lysates were then incubated with 30  $\mu$ l protein G Dynabeads overnight. The immunoprecipitated complexes were washed with the RIPA buffer three times and boiled in 30  $\mu$ l 2 $\times$  SDS-PAGE loading buffer at 95°C for 10 minutes. 25  $\mu$ l of the supernatant was resolved by SDS-PAGE.  
410 For MOV10 mass spectrometry, the gel was stained with Coomassie Blue dye, and the bands that were present in the MOV10 lane but absent in the IgG lane were sent for mass spectrometry at Wistar Institute Proteomics Core. For western blot analysis, the resolved proteins were transferred onto a nitrocellulose membrane using iBlot (Invitrogen) and immunoblotted with primary and secondary antibodies (S3 Table).

### **MOV10 HITS-CLIP**

MOV10 HITS-CLIP was performed as described previously [60]. Testes from P21 mice were collected, de-tunicated, dissociated by mild pipetting in ice-cold HBSS, and followed by UV crosslinking three times at 400 mJ/cm<sup>2</sup>, with 30-s intervals for cooling. Testicular cells were pelleted at 1200 g for 10 min at 4°C, washed with 1 $\times$ PBS, then the cell pellet was snap-frozen in liquid nitrogen and kept at -80°C if not  
420 used immediately. UV light-treated cells (from two testes) were lysed in 700  $\mu$ l of 1 $\times$ RIPA buffer (10 mM

Tris-HCl, pH 8.0, 140 mM NaCl, 1% Trion X-100, 0.1% sodium deoxycholate, 0.1% SDS, 1 mM EDTA) with 1 mM PMSF at 4°C for 1 hour. After that, lysates were treated with 10 µl DNase (Promega) and 2 µl RNase T1 at 37°C for 5 min. The lysates were centrifuged at 90,000g for 30 min at 4°C.

For each immunoprecipitation, 3 µg of rabbit anti-MOV10 polyclonal antibody (A301-571A, Bethyl lab) was bound on protein A Dynabeads in the antibody-binding buffer (0.1 M Na<sub>3</sub>PO<sub>4</sub>, pH 8, 0.1% IGEPAL CA-630, 5% Glycerol) at 4°C for 3 hours, and then antibody-bound beads were washed three times with 1×PBS. Antibody-bound beads were incubated with lysates at 4°C for 3 hours. Ligation of the <sup>32</sup>P labeled RL3 RNA adapter was described before [60]. Immunoprecipitation beads were eluted for 10 min at 70°C using 30 µl 2×SDS sample buffer. The eluted samples were separated by 10% precast gels (Biorad, 4561033). Cross-linked RNA–protein complexes were transferred onto the nitrocellulose membrane (Invitrogen, LC2001), and then the membrane was exposed to film overnight. Membrane regions containing the main radioactive signal and up to 15 kDa higher were cut. RNA extraction, 5' linker ligation (RL5), reverse transcription and two rounds of PCR were performed as described previously [60]. The sequences of the primers for the first PCR (DP3 and DP5) and the second PCR (DSFP3 and DSFP5) were available in S4 Table. The DNA products were resolved on 3% agarose gels and extracted with QIAquick gel extraction kit and submitted for deep sequencing. Four libraries with different indexes (S4 Table) were sequenced on the Illumina HiSeq 2500 platform at 100 cycles. MOV10 HITS-CLIP data were analyzed as previously described [25]. The MOV10 HITS-CLIP-seq data are available under the GEO accession no: GSE217336.

The expression of MOV10-bound transcripts in mouse somatic tissues was obtained by re-analyzing the RNA-seq data from these mouse tissues: liver, bone marrow, bone, retina, kidney, prefrontal cortex, and brain stem [45-50].

### RNA-Seq and data analysis

Total RNA was isolated from 6 pairs of P21 mouse testes (3 pairs of wild type and 3 pairs of *Mov10*<sup>-/-</sup>) using TRIzol reagents (Thermo Fisher Scientific). 1 µg of total RNA from each sample was used to generate RNA-seq libraries using TruSeq Stranded mRNA Library Preparation Kit Set A (Cat. No. RS-122-2101, Illumina) according to the manufacturer's instruction. The quality of libraries was evaluated using the Agilent 4200 TapeStation (Agilent Technologies). All 6 individual libraries were pooled in equal amount and sequenced with the HiSeq 4000 platform (Illumina). The RNA-seq data are available under the GEO accession no: GSE217336.

Adapter sequences were trimmed and the low-quality reads were removed. The clean reads were mapped to the mouse genome (mm10) using STAR with default parameters. The number of reads mapped

to each gene was counted by htseq-count (<http://www-huber.embl.de/users/anders/HTSeq/>) based on the  
455 annotation from ENSEMBL (<http://uswest.ensembl.org/>) mouse gene annotation v99. The expression of  
transposable elements was analyzed using TETranscripts [61]. Identification of differentially expressed  
genes was performed by edgeR. Differential expression was defined as a fold change greater than 2 and  
false discovery rate (FDR) < 0.05. FDR was calculated based on Benjamini and Hochberg multiple testing  
correction.

460

## Statistics

Statistical analysis was performed with Student's *t*-test, if not otherwise described.

## Supporting information

465

**S1 Fig MOV10 forms a complex with UPF1 in mouse testis.** (A) Identification of MOV10-associated  
proteins in lysates from postnatal day 20 (P20) mouse testes by immunoprecipitation and mass  
spectrometry. The gel was stained with Coomassie Blue dye. The four bands indicated by vertical lines in  
the MOV10 immunoprecipitation lane were subjected to protein identification by mass spectrometry. The  
470 bands containing MOV10 or UPF1 are labelled. (B) Co-immunoprecipitation analysis of MOV10 and  
UPF1 in P20 *Mov10*<sup>+/+</sup> and *Mov10*<sup>-/-</sup> testes. IP was performed with anti-MOV10 antibody. (C) Reciprocal  
co-immunoprecipitation analysis of MOV10 and UPF1 in P20 wild type testes. IP was performed with  
anti-UPF1 antibody.

475 **S2 Fig Expression and subcellular localization of MOV10 in mouse testis and ovary.** (A) Western  
blot analysis of MOV10 in developing mouse testes. The timing of the first appearance of spermatogonia,  
preleptotene spermatocytes, pachytene spermatocytes, round spermatids, and elongated spermatids in  
developing testes is shown. ACTB serves as a loading control. (B) Immunofluorescence of MOV10 in  
frozen sections of mouse testes at different ages and 8-week-old ovary. The expression levels of MOV10  
480 are depicted in different colors at the bottom diagram. The stage of seminiferous tubules in 8-week-old  
testis is shown in roman numerals. GC, gonocytes; Sg, spermatogonia; SC, Sertoli cells; Lep, leptotene;  
Zyg, zygotene; Pa, pachytene; RS, round spermatids; ES, elongated spermatids. Scale bar, 50  $\mu$ m.

**S3 Fig The domain structure of mouse MOV10, targeted inactivation of the *Mov10* gene, and *Mov10*  
485 mouse mutants.** (A) Schematic diagram of the mouse MOV10 RNA helicase domains. The two different  
RNA helicase domains are color coded. (B) Targeted inactivation of the *Mov10* gene. Targeting vector,



floxed conditional allele, and knockout allele are shown. The *Mov10* gene has 21 exons based on the cDNA under accession number NM\_001163440.1. Deletion of exons 8-14 encoding aa 455-807 removes the first RNA helicase domain (in green) and results in a frame shift in the resulting transcript. The  
490 protein regions encoded by colored exons match those in panel A. (C) Immunofluorescence of MOV10 in frozen sections of testes from 8-week-old *Mov10*<sup>+/+</sup>, *Mov10*<sup>fl/fl</sup> *Amh-Cre* (Sertoli cell-specific conditional knockout), *Mov10*<sup>fl/-</sup> *Ddx4-Cre* (Germ cell-specific conditional knockout), and *Mov10*<sup>-/-</sup> (global knockout) mice. The meshwork-like green fluorescence pattern in *Mov10*<sup>fl/-</sup> *Ddx4-Cre* testis section is due to the expression of MOV10 in the cytoplasm of Sertoli cells, but is absent in *Mov10*<sup>fl/fl</sup> *Amh-Cre* testis section  
495 as expected. Sg, spermatogonia; PreL, preleptotene spermatocytes; Lep, leptotene spermatocyte; Sertoli, Sertoli cells. Scale bar, 50  $\mu$ m.

### **S1 Table. MOV10 CLIP-seq data.**

(XLSX)

500

### **S2 Table. List of DE genes in *Mov10* KO testes and GO analysis.**

(XLSX)

### **S3 Table. Primary and secondary antibodies.**

505 (DOCX)

### **S4 Table. Primers used in MOV10 HITS-CLIP.**

(DOCX)

## **Acknowledgments**

We thank Wenfeng An for the L1<sup>tg</sup> mice, Hsin-Yao Tang and Thomas Beer for mass spectrometry, Jonathan Schug for Next-gen sequencing, Shantan Reddy, Aoife Roche, and Frederic Bushman for advice on the retrotransposition analysis. We thank Frederic Bushman and Leslie King for critical reading of the manuscript.

515

**Author contributions:** P.J.W. and Y.G. conceptualized the study and designed the experiments. Y.G. generated the *Mov10* knockout mice and performed most of the experiments. H.G. and G.L performed HITS-CLIP and RNA-seq analyses. A.V., P.A., M.M., and Z.M helped with HITS-CLIP analysis. G.L. contributed to Next-generation sequencing analysis. N.A.L. performed the blastocyst injection of *Mov10*

520 floxed ES cells. Y.G. and P.J.W. wrote the manuscript. P.J.W. supervised all aspects of the work.

**Competing interests:** The authors declare that they have no competing interests. **Data and materials**

**availability:** The CLIP-seq and RNA-seq data that support the findings of this study are publicly available from NCBI under the GEO accession no: GSE217336.

## 525 **References**

1. Goodier JL, Kazazian HH, Jr. Retrotransposons revisited: the restraint and rehabilitation of parasites. *Cell*. 2008;135(1):23-35. doi: 10.1016/j.cell.2008.09.022.
2. Levin HL, Moran JV. Dynamic interactions between transposable elements and their hosts. *Nature reviews Genetics*. 2011;12(9):615-27. doi: 10.1038/nrg3030 [doi].
- 530 3. Huang CR, Burns KH, Boeke JD. Active transposition in genomes. *Annual Review of Genetics*. 2012;46:651-75. doi: 10.1146/annurev-genet-110711-155616 [doi].
4. Modzelewski AJ, Gan Chong J, Wang T, He L. Mammalian genome innovation through transposon domestication. *Nat Cell Biol*. 2022;24(9):1332-40. Epub 20220825. doi: 10.1038/s41556-022-00970-4. PubMed PMID: 36008480.
- 535 5. Yang F, Wang PJ. Multiple LINEs of retrotransposon silencing mechanisms in the mammalian germline. *Seminars in cell & developmental biology*. 2016;59:118-25. doi: S1084-9521(16)30066-0 [pii].
6. DeBerardinis RJ, Goodier JL, Ostertag EM, Kazazian HH, Jr. Rapid amplification of a retrotransposon subfamily is evolving the mouse genome. *Nature genetics*. 1998;20(3):288-90. doi: 10.1038/3104 [doi].
- 540 7. Sassaman DM, Dombroski BA, Moran JV, Kimberland ML, Naas TP, DeBerardinis RJ, et al. Many human L1 elements are capable of retrotransposition. *Nature genetics*. 1997;16(1):37-43. doi: 10.1038/ng0597-37 [doi].
8. Mandal PK, Kazazian HH, Jr. SnapShot: Vertebrate transposons. *Cell*. 2008;135(1):192-.e1. doi: 10.1016/j.cell.2008.09.028.
- 545 9. Martin SL, Cruceanu M, Branciforte D, Wai-Lun Li P, Kwok SC, Hodges RS, et al. LINE-1 retrotransposition requires the nucleic acid chaperone activity of the ORF1 protein. *Journal of Molecular Biology*. 2005;348(3):549-61. doi: S0022-2836(05)00257-3 [pii].
10. Feng Q, Moran JV, Kazazian HH, Jr., Boeke JD. Human L1 retrotransposon encodes a conserved endonuclease required for retrotransposition. *Cell*. 1996;87(5):905-16. doi: S0092-8674(00)81997-2 [pii].
- 550 11. Mathias SL, Scott AF, Kazazian HH, Jr., Boeke JD, Gabriel A. Reverse transcriptase encoded by a human transposable element. *Science (New York, NY)*. 1991;254(5039):1808-10.
12. Roy-Engel AM. LINEs, SINEs and other retroelements: do birds of a feather flock together? *Frontiers in bioscience (Landmark edition)*. 2012;17:1345-61. doi: 3991 [pii].
- 555 13. Ade C, Roy-Engel AM. SINE Retrotransposition: Evaluation of Alu Activity and Recovery of De Novo Inserts. *Methods in molecular biology (Clifton, NJ)*. 2016;1400:183-201. doi: 10.1007/978-1-4939-3372-3\_13 [doi].
14. Bourc'his D, Bestor TH. Meiotic catastrophe and retrotransposon reactivation in male germ cells lacking Dnmt3L. *Nature*. 2004;431(7004):96-9. doi: 10.1038/nature02886.
- 560 15. Kaneda M, Okano M, Hata K, Sado T, Tsujimoto N, Li E, et al. Essential role for de novo DNA methyltransferase Dnmt3a in paternal and maternal imprinting. *Nature*. 2004;429(6994):900-3. doi: 10.1038/nature02633. PubMed PMID: 15215868.
16. Matsui T, Leung D, Miyashita H, Maksakova IA, Miyachi H, Kimura H, et al. Proviral silencing in embryonic stem cells requires the histone methyltransferase ESET. *Nature*. 2010;464(7290):927-31. Epub 20100217. doi: 10.1038/nature08858. PubMed PMID: 20164836.
- 565

17. Rowe HM, Jakobsson J, Mesnard D, Rougemont J, Reynard S, Aktas T, et al. KAP1 controls endogenous retroviruses in embryonic stem cells. *Nature*. 2010;463(7278):237-40. doi: 10.1038/nature08674. PubMed PMID: 20075919.
- 570 18. Houwing S, Kamminga LM, Berezikov E, Cronembold D, Girard A, van den Elst H, et al. A role for Piwi and piRNAs in germ cell maintenance and transposon silencing in Zebrafish. *Cell*. 2007;129(1):69-82. doi: S0092-8674(07)00392-3 [pii].
19. Kuramochi-Miyagawa S, Watanabe T, Gotoh K, Totoki Y, Toyoda A, Ikawa M, et al. DNA methylation of retrotransposon genes is regulated by Piwi family members MILI and MIWI2 in murine fetal testes. *Genes & development*. 2008;22(7):908-17. doi: 10.1101/gad.1640708.
- 575 20. Ozata DM, Gainetdinov I, Zoch A, O'Carroll D, Zamore PD. PIWI-interacting RNAs: small RNAs with big functions. *Nature reviews Genetics*. 2019;20(2):89-108. doi: 10.1038/s41576-018-0073-3 [doi].
21. Wang PJ, McCarrey JR, Yang F, Page DC. An abundance of X-linked genes expressed in spermatogonia. *NatGenet*. 2001;27(4):422-6.
22. Zheng K, Xiol J, Reuter M, Eckardt S, Leu NA, McLaughlin KJ, et al. Mouse MOV10L1 associates with Piwi proteins and is an essential component of the Piwi-interacting RNA (piRNA) pathway. *Proceedings of the National Academy of Sciences of the United States of America*. 2010;107(26):11841-6. doi: 10.1073/pnas.1003953107.
- 585 23. Zheng K, Wang PJ. Blockade of pachytene piRNA biogenesis reveals a novel requirement for maintaining post-meiotic germline genome integrity. *PLoS genetics*. 2012;8(11):e1003038. doi: 10.1371/journal.pgen.1003038; 10.1371/journal.pgen.1003038.
24. Frost RJ, Hamra FK, Richardson JA, Qi X, Bassel-Duby R, Olson EN. MOV10L1 is necessary for protection of spermatocytes against retrotransposons by Piwi-interacting RNAs. *Proceedings of the National Academy of Sciences of the United States of America*. 2010;107(26):11847-52. doi: 590 10.1073/pnas.1007158107.
25. Vourekas A, Zheng K, Fu Q, Maragkakis M, Alexiou P, Ma J, et al. The RNA helicase MOV10L1 binds piRNA precursors to initiate piRNA processing. *Genes & development*. 2015;29(6):617-29. doi: 10.1101/gad.254631.114 [doi].
- 595 26. Fu Q, Pandey RR, Leu NA, Pillai RS, Wang PJ. Mutations in the MOV10L1 ATP Hydrolysis Motif Cause piRNA Biogenesis Failure and Male Sterility in Mice. *Biology of reproduction*. 2016;95(5):103. doi: biolreprod.116.142430 [pii].
27. Guan Y, Keeney S, Jain D, Wang PJ. yama, a mutant allele of Mov10l1, disrupts retrotransposon silencing and piRNA biogenesis. *PLoS Genet*. 2021;17(2):e1009265. Epub 20210226. doi: 600 10.1371/journal.pgen.1009265. PubMed PMID: 33635934; PubMed Central PMCID: PMC7946307.
28. Taylor MS, LaCava J, Mita P, Molloy KR, Huang CR, Li D, et al. Affinity proteomics reveals human host factors implicated in discrete stages of LINE-1 retrotransposition. *Cell*. 2013;155(5):1034-48. doi: 10.1016/j.cell.2013.10.021 [doi].
- 605 29. Goodier JL, Cheung LE, Kazazian HH, Jr. Mapping the LINE1 ORF1 protein interactome reveals associated inhibitors of human retrotransposition. *Nucleic acids research*. 2013;41(15):7401-19. doi: 10.1093/nar/gkt512 [doi].
30. Gregersen LH, Schueler M, Munschauer M, Mastrobuoni G, Chen W, Kempa S, et al. MOV10 Is a 5' to 3' RNA helicase contributing to UPF1 mRNA target degradation by translocation along 3' UTRs. *Molecular cell*. 2014;54(4):573-85. doi: 10.1016/j.molcel.2014.03.017 [doi].
- 610 31. Wang X, Han Y, Dang Y, Fu W, Zhou T, Ptak RG, et al. Moloney leukemia virus 10 (MOV10) protein inhibits retrovirus replication. *The Journal of biological chemistry*. 2010;285(19):14346-55. doi: 10.1074/jbc.M110.109314 [doi].
32. Burdick R, Smith JL, Chaipan C, Friew Y, Chen J, Venkatachari NJ, et al. P body-associated protein Mov10 inhibits HIV-1 replication at multiple stages. *Journal of virology*. 2010;84(19):10241-53. doi: 615 10.1128/JVI.00585-10 [doi].

33. Abudu A, Wang X, Dang Y, Zhou T, Xiang SH, Zheng YH. Identification of molecular determinants from Moloney leukemia virus 10 homolog (MOV10) protein for virion packaging and anti-HIV-1 activity. *The Journal of biological chemistry*. 2012;287(2):1220-8. doi: 10.1074/jbc.M111.309831 [doi].
- 620
34. Cuevas RA, Ghosh A, Wallerath C, Hornung V, Coyne CB, Sarkar SN. MOV10 Provides Antiviral Activity against RNA Viruses by Enhancing RIG-I-MAVS-Independent IFN Induction. *Journal of immunology (Baltimore, Md: 1950)*. 2016;196(9):3877-86. doi: 10.4049/jimmunol.1501359 [doi].
35. Arjan-Odedra S, Swanson CM, Sherer NM, Wolinsky SM, Malim MH. Endogenous MOV10 inhibits the retrotransposition of endogenous retroelements but not the replication of exogenous retroviruses. *Retrovirology*. 2012;9:53-. doi: 10.1186/1742-4690-9-53 [doi].
- 625
36. Goodier JL, Cheung LE, Kazazian HH, Jr. MOV10 RNA helicase is a potent inhibitor of retrotransposition in cells. *PLoS genetics*. 2012;8(10):e1002941. doi: 10.1371/journal.pgen.1002941 [doi].
- 630
37. Lu C, Luo Z, Jager S, Krogan NJ, Peterlin BM. Moloney leukemia virus type 10 inhibits reverse transcription and retrotransposition of intracisternal particles. *Journal of virology*. 2012;86(19):10517-23. doi: 10.1128/JVI.00868-12 [doi].
38. Li X, Zhang J, Jia R, Cheng V, Xu X, Qiao W, et al. The MOV10 helicase inhibits LINE-1 mobility. *The Journal of biological chemistry*. 2013;288(29):21148-60. doi: 10.1074/jbc.M113.465856 [doi].
- 635
39. Choi J, Hwang SY, Ahn K. Interplay between RNASEH2 and MOV10 controls LINE-1 retrotransposition. *Nucleic Acids Res*. 2018;46(4):1912-26. doi: 10.1093/nar/gkx1312. PubMed PMID: 29315404; PubMed Central PMCID: PMC5829647.
40. Warkocki Z, Krawczyk PS, Adamska D, Bijata K, Garcia-Perez JL, Dziembowski A. Uridylation by TUT4/7 Restricts Retrotransposition of Human LINE-1s. *Cell*. 2018;174(6):1537-48 e29. Epub 20180816. doi: 10.1016/j.cell.2018.07.022. PubMed PMID: 30122351; PubMed Central PMCID: PMC6191937.
- 640
41. Gallardo T, Shirley L, John GB, Castrillon DH. Generation of a germ cell-specific mouse transgenic Cre line, Vasa-Cre. *Genesis (New York, NY: 2000)*. 2007;45(6):413-7. doi: 10.1002/dvg.20310.
42. Holdcraft RW, Braun RE. Androgen receptor function is required in Sertoli cells for the terminal differentiation of haploid spermatids. *Development (Cambridge, England)*. 2004;131(2):459-67. doi: 10.1242/dev.00957 [doi].
- 645
43. Lewandoski M, Meyers EN, Martin GR. Analysis of Fgf8 gene function in vertebrate development. *Cold Spring Harb Symp Quant Biol*. 1997;62:159-68.
44. Ule J, Jensen K, Mele A, Darnell RB. CLIP: a method for identifying protein-RNA interaction sites in living cells. *Methods (San Diego, Calif)*. 2005;37(4):376-86. doi: 10.1016/j.ymeth.2005.07.018.
- 650
45. Foldy C, Darmanis S, Aoto J, Malenka RC, Quake SR, Sudhof TC. Single-cell RNAseq reveals cell adhesion molecule profiles in electrophysiologically defined neurons. *Proc Natl Acad Sci U S A*. 2016;113(35):E5222-31. Epub 20160816. doi: 10.1073/pnas.1610155113. PubMed PMID: 27531958; PubMed Central PMCID: PMC5024636.
- 655
46. Kistler WS, Baas D, Lemeille S, Paschaki M, Seguin-Estevez Q, Barras E, et al. RFX2 Is a Major Transcriptional Regulator of Spermiogenesis. *PLoS Genet*. 2015;11(7):e1005368. Epub 20150710. doi: 10.1371/journal.pgen.1005368. PubMed PMID: 26162102; PubMed Central PMCID: PMC4498915.
47. Lakhia R, Hajarnis S, Williams D, Aboudehen K, Yheskel M, Xing C, et al. MicroRNA-21 Aggravates Cyst Growth in a Model of Polycystic Kidney Disease. *J Am Soc Nephrol*. 2016;27(8):2319-30. Epub 20151217. doi: 10.1681/ASN.2015060634. PubMed PMID: 26677864; PubMed Central PMCID: PMC4978047.
- 660
48. Lizen B, Moens C, Mouheiche J, Sacre T, Ahn MT, Jeannotte L, et al. Conditional Loss of Hoxa5 Function Early after Birth Impacts on Expression of Genes with Synaptic Function. *Front Mol Neurosci*. 2017;10:369. Epub 20171115. doi: 10.3389/fnmol.2017.00369. PubMed PMID: 29187810; PubMed Central PMCID: PMC5695161.
- 665

49. Quarto N, Shailendra S, Meyer NP, Menon S, Renda A, Longaker MT. Twist1-Haploinsufficiency Selectively Enhances the Osteoskeletal Capacity of Mesoderm-Derived Parietal Bone Through Downregulation of Fgf23. *Front Physiol.* 2018;9:1426. Epub 20181015. doi: 10.3389/fphys.2018.01426. PubMed PMID: 30374308; PubMed Central PMCID: PMC6196243.
- 670 50. Roger JE, Hiriyanna A, Gotoh N, Hao H, Cheng DF, Ratnapriya R, et al. OTX2 loss causes rod differentiation defect in CRX-associated congenital blindness. *J Clin Invest.* 2014;124(2):631-43. Epub 20140102. doi: 10.1172/JCI72722. PubMed PMID: 24382353; PubMed Central PMCID: PMC6196243.
- 675 51. Skariah G, Seimetz J, Norsworthy M, Lannom MC, Kenny PJ, Elrakhawy M, et al. Mov10 suppresses retroelements and regulates neuronal development and function in the developing brain. *BMC biology.* 2017;15(1):54-1. doi: 10.1186/s12915-017-0387-1 [doi].
52. Newkirk SJ, Lee S, Grandi FC, Gaysinskaya V, Rosser JM, Vanden Berg N, et al. Intact piRNA pathway prevents L1 mobilization in male meiosis. *Proceedings of the National Academy of Sciences of the United States of America.* 2017;114(28):E5635-E44. doi: 10.1073/pnas.1701069114 [doi].
- 680 53. Zhang X, Yu L, Ye S, Xie J, Huang X, Zheng K, et al. MOV10L1 Binds RNA G-Quadruplex in a Structure-Specific Manner and Resolves It More Efficiently Than MOV10. *iScience.* 2019;17:36-48. doi: S2589-0042(19)30198-1 [pii].
54. Kenny PJ, Zhou H, Kim M, Skariah G, Khetani RS, Drnevich J, et al. MOV10 and FMRP regulate AGO2 association with microRNA recognition elements. *Cell reports.* 2014;9(5):1729-41. doi: 10.1016/j.celrep.2014.10.054 [doi].
- 685 55. Arora R, Bodak M, Penouty L, Hackman C, Ciaudo C. Sequestration of LINE-1 in cytosolic aggregates by MOV10 restricts retrotransposition. *EMBO Rep.* 2022;23(9):e54458. Epub 20220720. doi: 10.15252/embr.202154458. PubMed PMID: 35856394; PubMed Central PMCID: PMC9442310.
- 690 56. Tomari Y, Du T, Haley B, Schwarz DS, Bennett R, Cook HA, et al. RISC assembly defects in the *Drosophila* RNAi mutant armitage. *Cell.* 2004;116(6):831-41.
57. Saito K, Ishizu H, Komai M, Kotani H, Kawamura Y, Nishida KM, et al. Roles for the Yb body components Armitage and Yb in primary piRNA biogenesis in *Drosophila*. *Genes & development.* 2010;24(22):2493-8. doi: 10.1101/gad.1989510.
- 695 58. Yang S, Zhang X, Li X, Yin X, Teng L, Ji G, et al. Evolutionary and Expression Analysis of MOV10 and MOV10L1 Reveals Their Origin, Duplication and Divergence. *Int J Mol Sci.* 2022;23(14). Epub 20220707. doi: 10.3390/ijms23147523. PubMed PMID: 35886872; PubMed Central PMCID: PMC9319325.
- 700 59. Muotri AR, Chu VT, Marchetto MC, Deng W, Moran JV, Gage FH. Somatic mosaicism in neuronal precursor cells mediated by L1 retrotransposition. *Nature.* 2005;435(7044):903-10. doi: 10.1038/nature03663.
60. Vourekas A, Mourelatos Z. HITS-CLIP (CLIP-Seq) for mouse Piwi proteins. *Methods Mol Biol.* 2014;1093:73-95. doi: 10.1007/978-1-62703-694-8\_7. PubMed PMID: 24178558.
- 705 61. Jin Y, Tam OH, Paniagua E, Hammell M. Tetrascripts: a package for including transposable elements in differential expression analysis of RNA-seq datasets. *Bioinformatics.* 2015;31(22):3593-9. Epub 20150723. doi: 10.1093/bioinformatics/btv422. PubMed PMID: 26206304; PubMed Central PMCID: PMC4757950.
- 710 62. Yang F, Cheng Y, An JY, Kwon YT, Eckardt S, Leu NA, et al. The Ubiquitin Ligase Ubr2, a Recognition E3 Component of the N-End Rule Pathway, Stabilizes Tex19.1 during Spermatogenesis. *PloS one.* 2010;5(11):e14017. doi: 10.1371/journal.pone.0014017.

## Figure legends

715

**Fig 1. Loss of MOV10 leads to incomplete penetrance of embryonic lethality.** (A) The expression of MOV10 in adult (8-week-old) mouse tissues. UPF1 is a MOV10-interacting protein (S1 Fig) [30]. ACTB serves as a loading control. Note that heart and skeletal muscle contain little ACTB. (B) MOV10 is cytoplasmic in 8-week-old testes. TEX19, SYCP3, and histone H3 serve as cytoplasmic, nuclear, and chromatin controls respectively [62]. (C) Western blot analysis of MOV10 in testes from 8-week-old *Mov10<sup>+/+</sup>*, *Mov10<sup>+/-</sup>*, and *Mov10<sup>-/-</sup>* mice. (D) Number of offspring from *Mov10<sup>+/-</sup>* × *Mov10<sup>+/-</sup>* crosses at E16.5 and postnatal day 14 (P14).

720

725

**Fig 2. Transcriptome-wide identification of MOV10 RNA targets in testis by HITS-CLIP.** (A) Graphic overview of the HITS-CLIP experimental strategy. (B) Autoradiography and Western blot analysis of the MOV10-RNA complexes from CLIP in testicular cells. Rabbit IgG serves as a negative control. Four libraries were constructed from RNA extracted from the main radioactive signal (red vertical line) and the higher position (black vertical line). (C) Distribution of MOV10 CLIP tags along mRNAs (5' UTR, coding sequence, and 3' UTR). (D) Expression heatmap of MOV10-bound transcripts in mouse testis and somatic tissues from 3-week-old mice or adult mice. The transcripts were ordered from strong to weak based on MOV10-binding strength from the CLIP data. (E) Relative abundance of MOV10 strongly bound transcripts in different tissues. (F) Relative abundance of MOV10 weakly bound transcripts in different tissues.

730

735

**Fig 3. Altered transcriptome in *Mov10*-deficient testes.** (A) Volcano plot of transcript levels of protein-coding genes between *Mov10<sup>+/+</sup>* and *Mov10<sup>-/-</sup>* testes at P21. Red dots indicate differentially expressed genes. (B) Relative expression of upregulated genes in *Mov10<sup>-/-</sup>* testes in different tissues. (C) Relative expression of downregulated genes in *Mov10<sup>-/-</sup>* testes in different tissues. (D) The correlation between the transcript fold change (*Mov10<sup>-/-</sup>*/*Mov10<sup>+/+</sup>*) from RNA-seq and MOV10 CLIP enrichment level. Each dot represents one transcript. (E) The expression of overall L1 elements in testes from P21 *Mov10<sup>+/+</sup>* and *Mov10<sup>-/-</sup>* mice. Each dot represents one L1 family. (F) Differentially expressed transposable elements in testes from P21 *Mov10<sup>+/+</sup>* and *Mov10<sup>-/-</sup>* mice. n=3 mice.

740

745

**Fig 4. MOV10 inhibits L1 retrotransposition *in vivo*.** (A) Schematic diagram of the single copy L1 reporter transgene (L1<sup>tg</sup>) as previously reported [52]. PCR primers P1 and P2 amplify both the donor transgene and new L1 insertion that lacks the intron. (B) The intron-flanking PCR detection of new L1

insertions in multiple tissues from E18.5 *Mov10*<sup>-/-</sup> L1<sup>tg/tg</sup> embryos and 8-week-old *Mov10*<sup>-/-</sup> L1<sup>tg/tg</sup> mice. The L1 donor transgene band (1.4 kb) and the new L1 insertion band (500 bp) are labeled. The black asterisk indicates the detected new L1 insertion band. (C) The percentage of the presence of new L1  
750 insertions in tissues from E18.5 *Mov10*<sup>-/-</sup> L1<sup>tg/tg</sup> embryos and 8-week *Mov10*<sup>-/-</sup> L1<sup>tg/tg</sup> mice. (D) The percentage of new L1 insertions in tissues from 8-week-old *Mov10*<sup>+/+</sup> L1<sup>tg/tg</sup>, *Mov10*<sup>+/-</sup> L1<sup>tg/tg</sup>, and *Mov10*<sup>-/-</sup> L1<sup>tg/tg</sup> mice. (E) Plot of L1 insertion frequency from the data in panel D. Each point represents L1 insertion frequency (percentage) in one tissue. Eight tissues (liver, kidney, spleen, testis, sperm, lung, brain, and heart) are included. Statistics, Student's *t*-Test. (F) The L1 insertion frequency in tail genomic  
755 DNA of offspring from different crosses.

**Fig 5. Effect of MOV10 deficiency on the fertility parameters over successive generations.** (A) Breeding strategy for successive generations of *Mov10*<sup>-/-</sup> mice. (B-F) Analyses of 8-week-old *Mov10*<sup>-/-</sup> mice over six generations: testis weight (B), sperm count (C), percentage of abnormal tubules (D),  
760 percentage of Sertoli cell only tubules (E), and litter size (F). Analyses of G0 *Mov10*<sup>+/-</sup> mice were included for comparison. Statistics, Student's *t*-Test; n.s., non-significant; \*, *p* < 0.05; \*\*, *p* < 0.01; \*\*\*, *p* < 0.001; \*\*\*\*, *p* < 0.0001. (G) Histology of testes from 8-week-old *Mov10*<sup>+/-</sup> and *Mov10*<sup>-/-</sup> mice. Abbreviations: SPC, spermatocyte; RS, round spermatids; ES, elongated spermatids; SC, Sertoli cells; AC, apoptotic cells. Scale bar, 50 μm.

765

**Fig 6. A unifying model on the function of two related RNA helicases (MOV10 and MOV10L1) in the control of retrotransposons.** MOV10L1 is a master regulator of biogenesis of all piRNAs. MOV10 is the first *in vivo* host restriction factor of L1 retrotransposition. L1 transcript is normally present at a very low level, due to transcriptional silencing of L1 by methylation of the CpG dinucleotides in the L1  
770 promoter. New L1 insertions are short (<1 kb) and often 5' truncated due to incomplete reverse transcription.

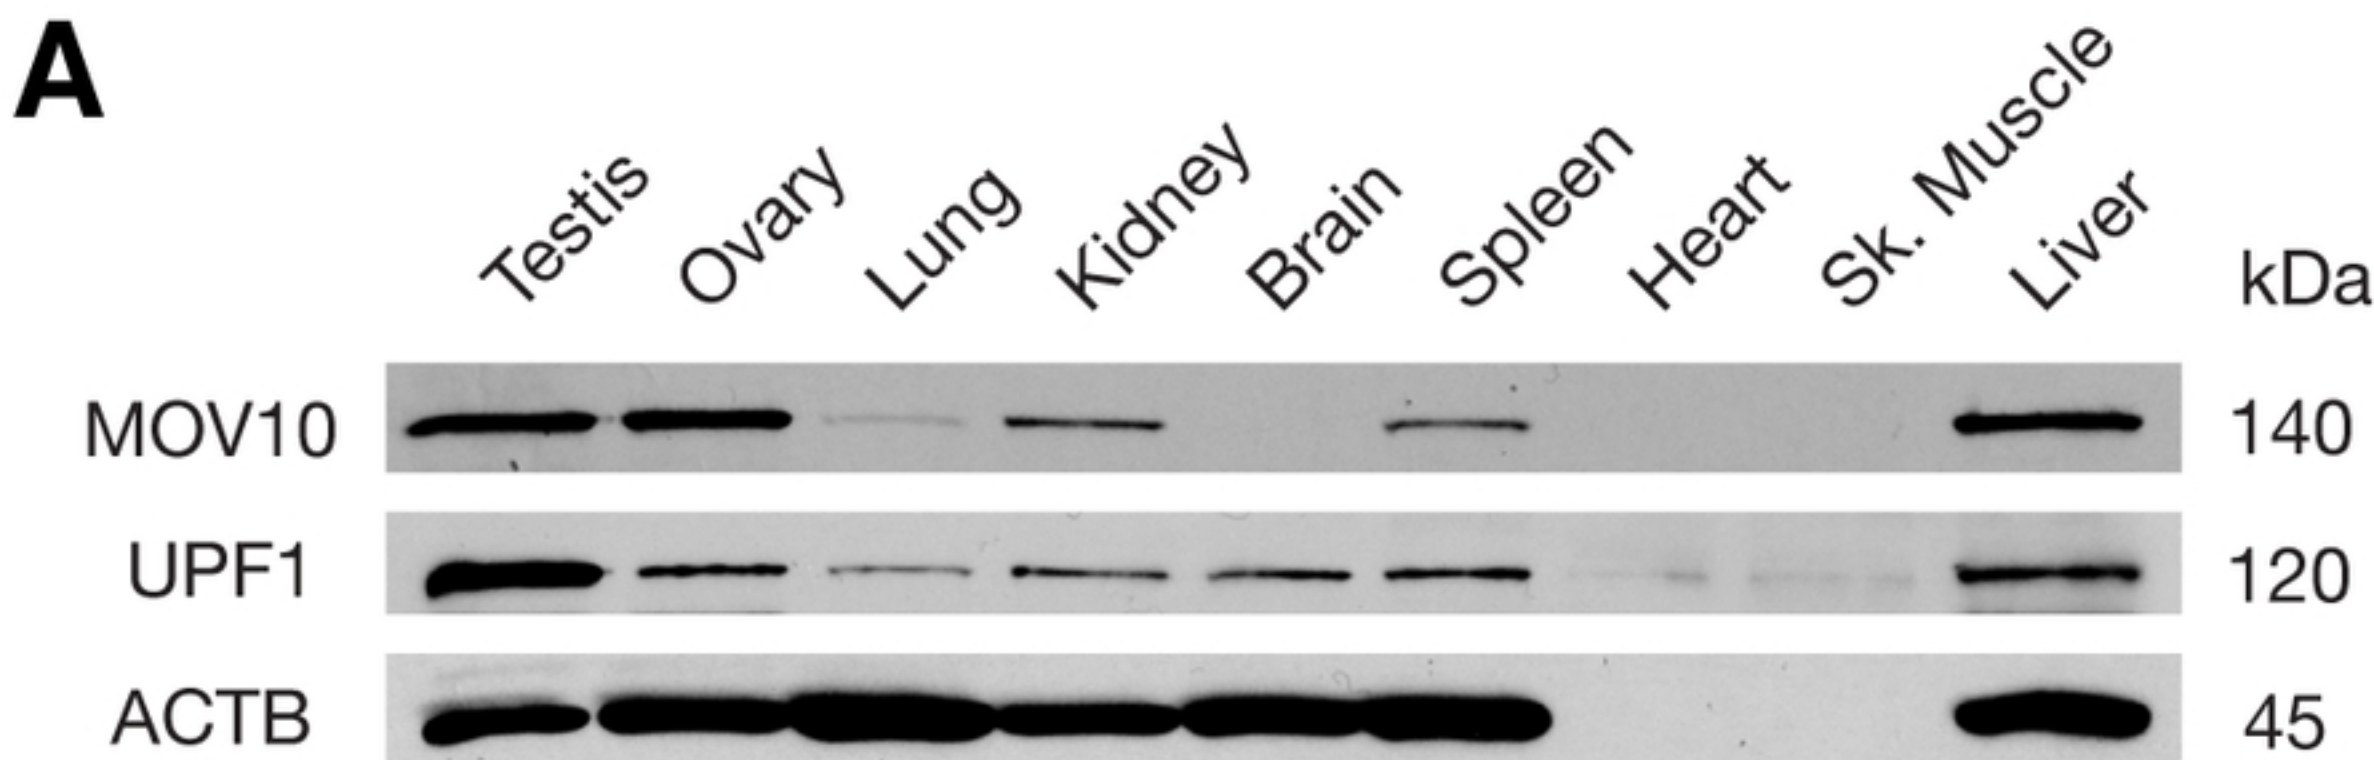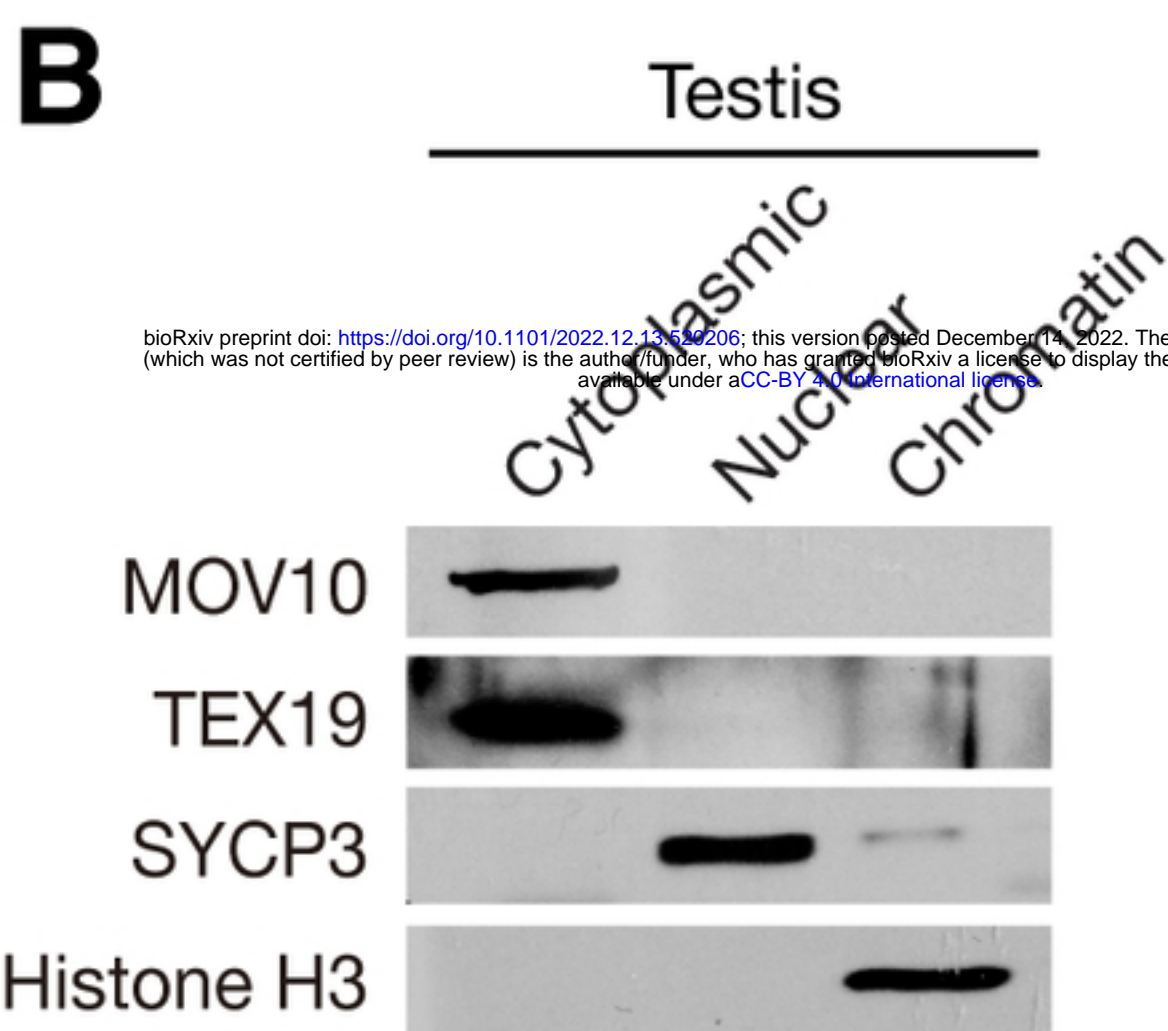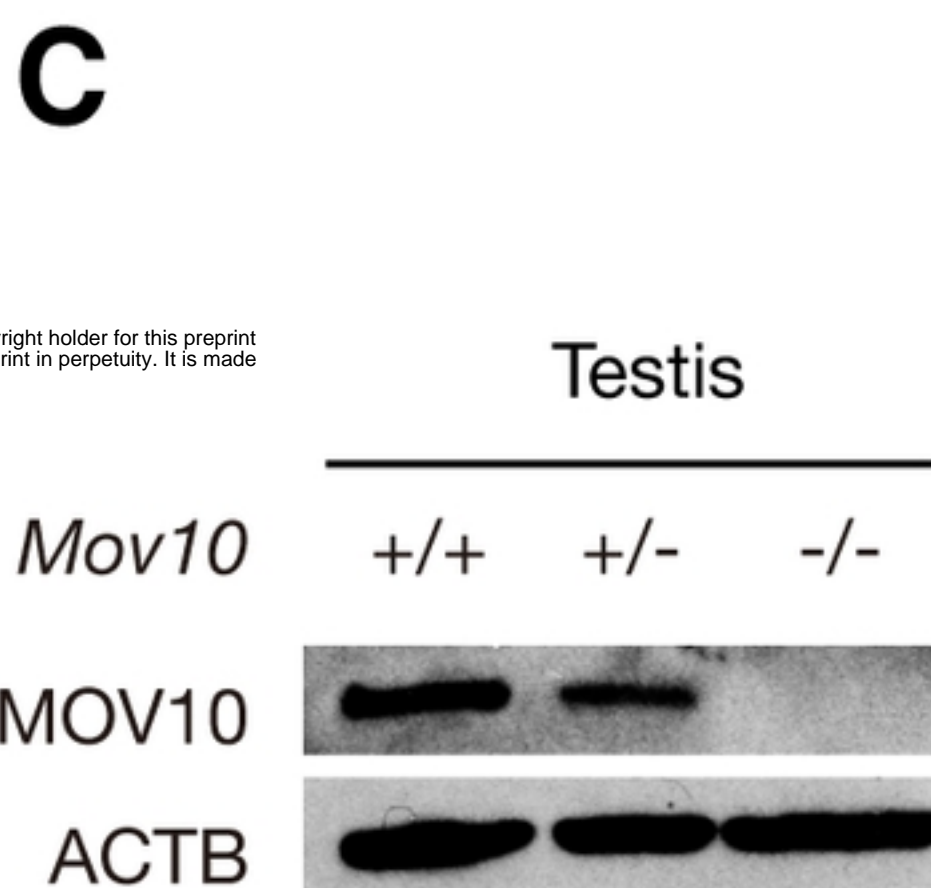

**D**

No. of offspring of *Mov10*<sup>+/-</sup> X *Mov10*<sup>+/-</sup> crosses

| Genotype             | <i>Mov10</i> <sup>+/+</sup> | <i>Mov10</i> <sup>+/-</sup> | <i>Mov10</i> <sup>-/-</sup> |
|----------------------|-----------------------------|-----------------------------|-----------------------------|
| E16.5<br>(6 litters) | 9                           | 18                          | 1 *                         |
| P14<br>(26 litters)  | 50                          | 88                          | 13 **                       |

\*  $\chi^2 = 6.8, p = 0.03$       \*\*  $\chi^2 = 22.3, p = 0.0001$

Figure 1



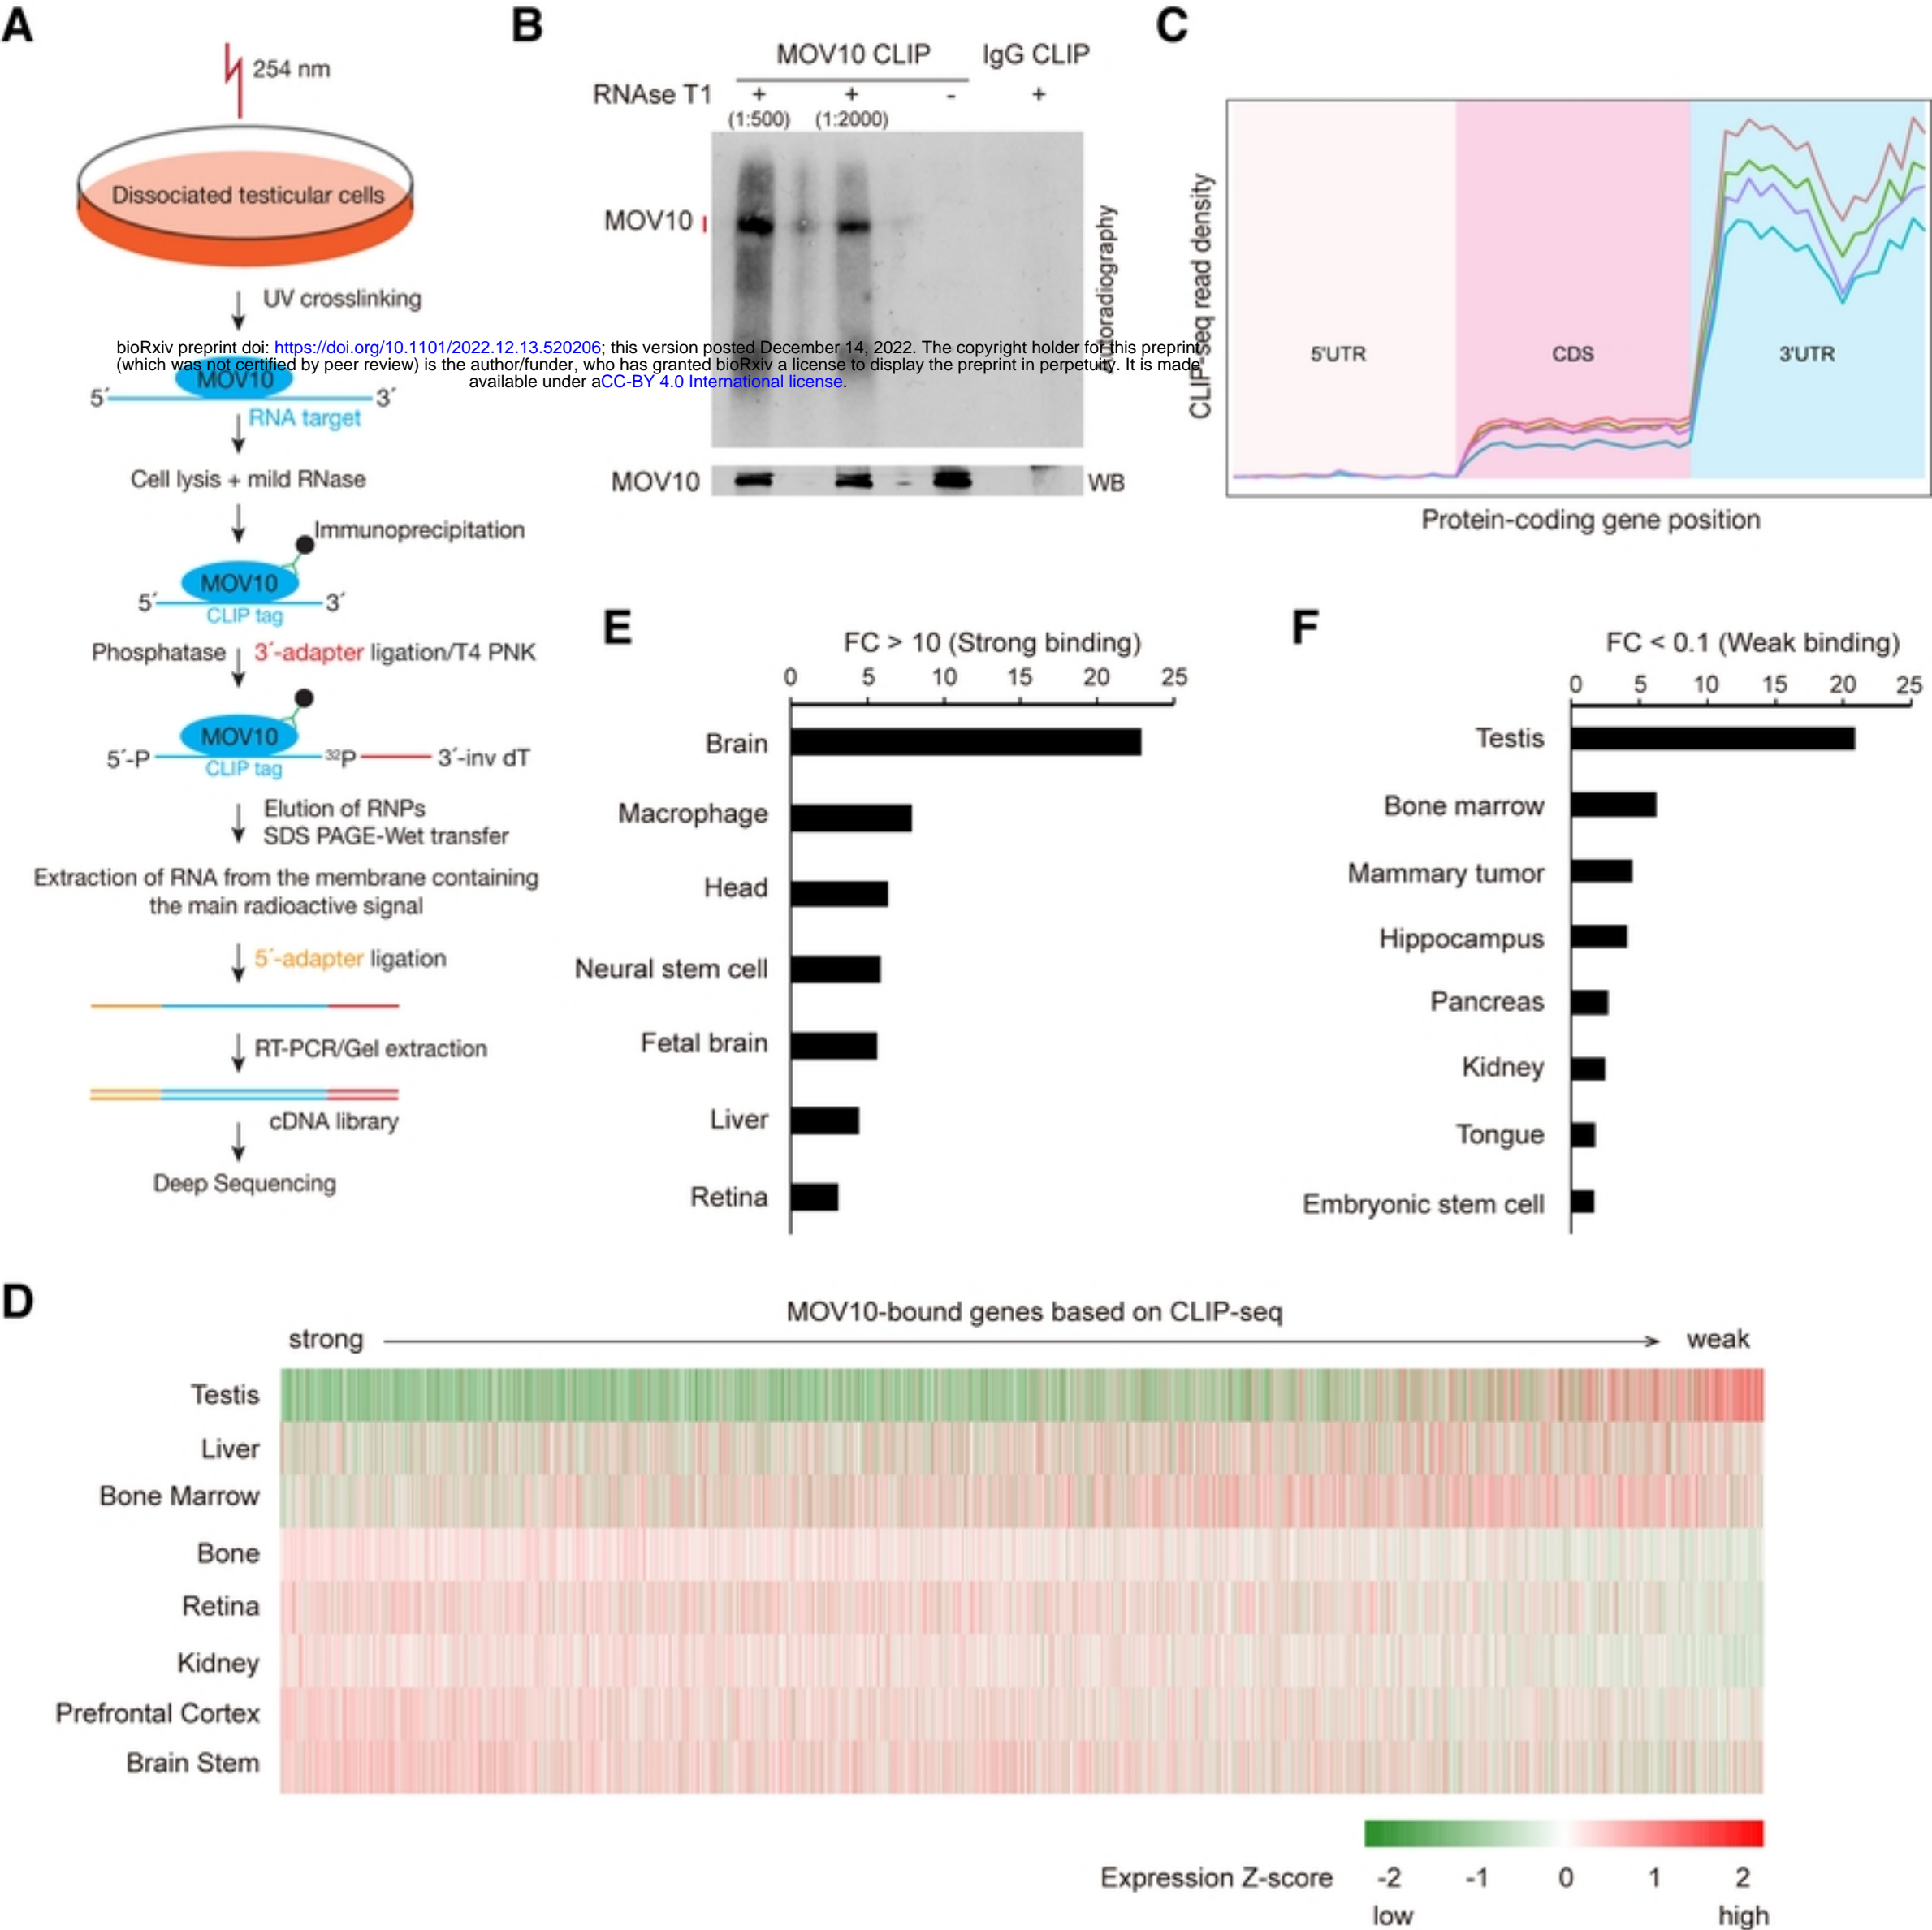

Figure 2

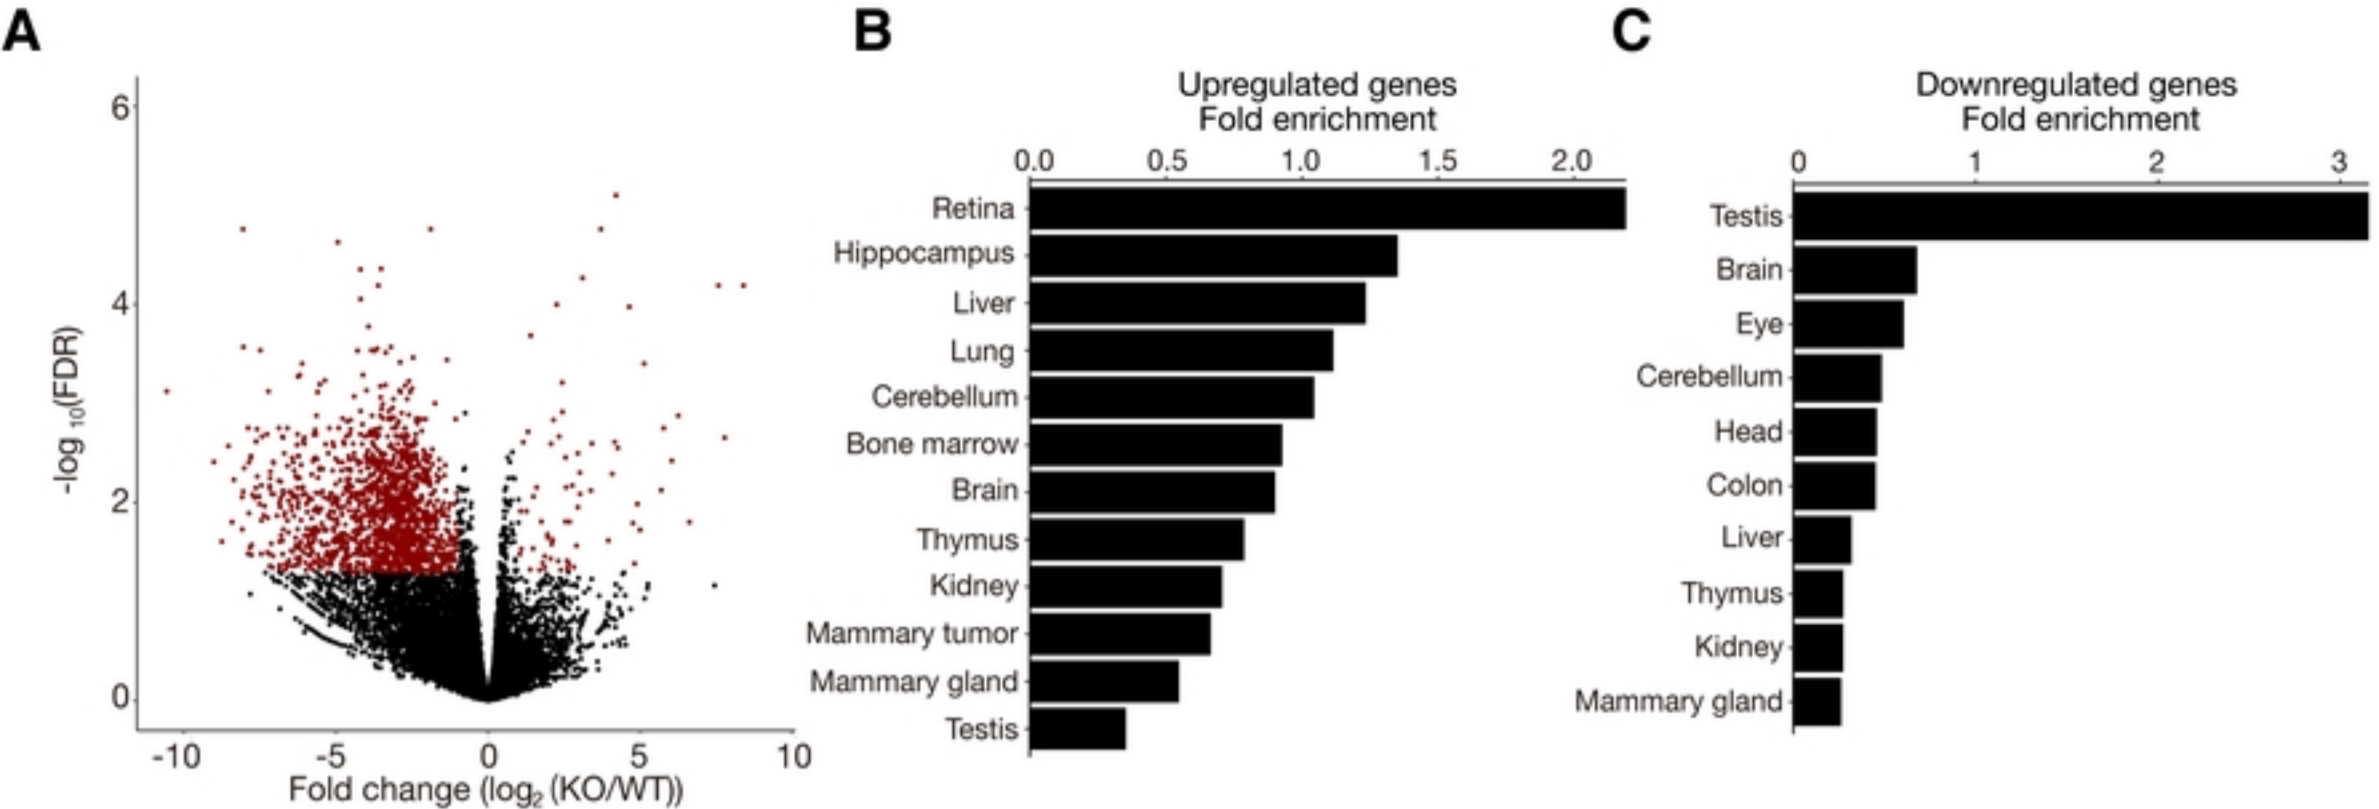

bioRxiv preprint doi: <https://doi.org/10.1101/2022.12.13.520206>; this version posted December 14, 2022. The copyright holder for this preprint (which was not certified by peer review) is the author/funder, who has granted bioRxiv a license to display the preprint in perpetuity. It is made available under aCC-BY 4.0 International license.

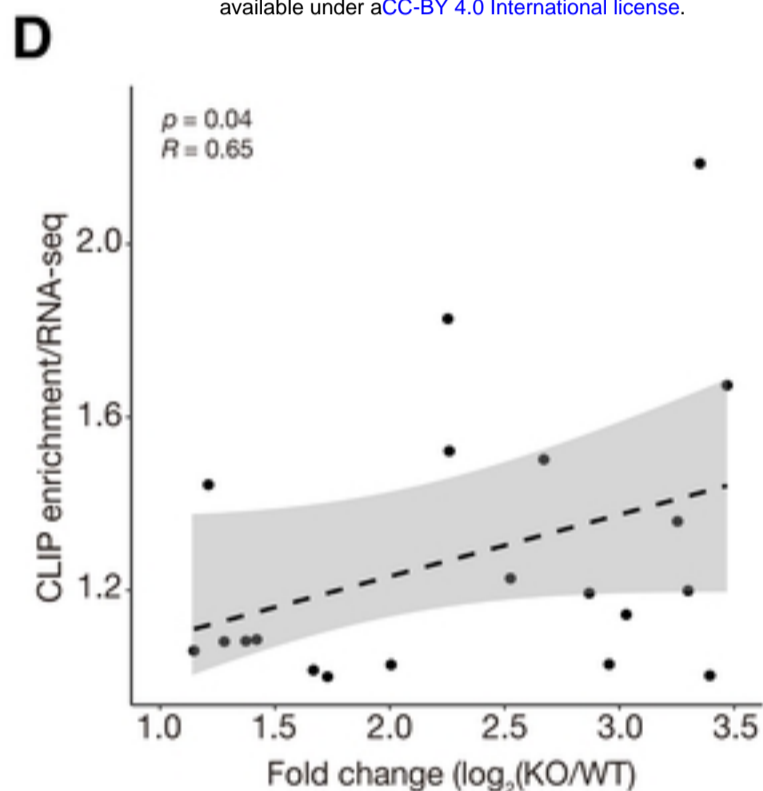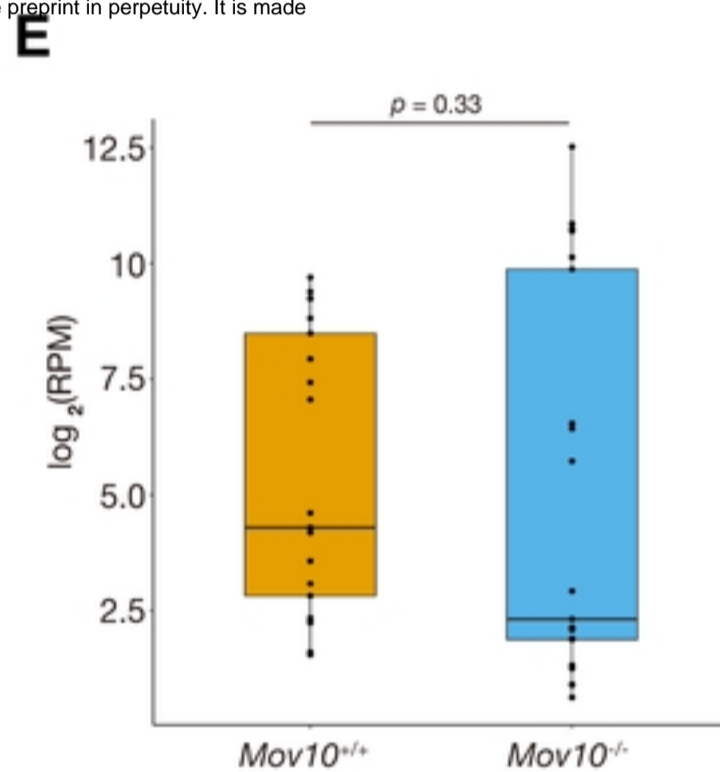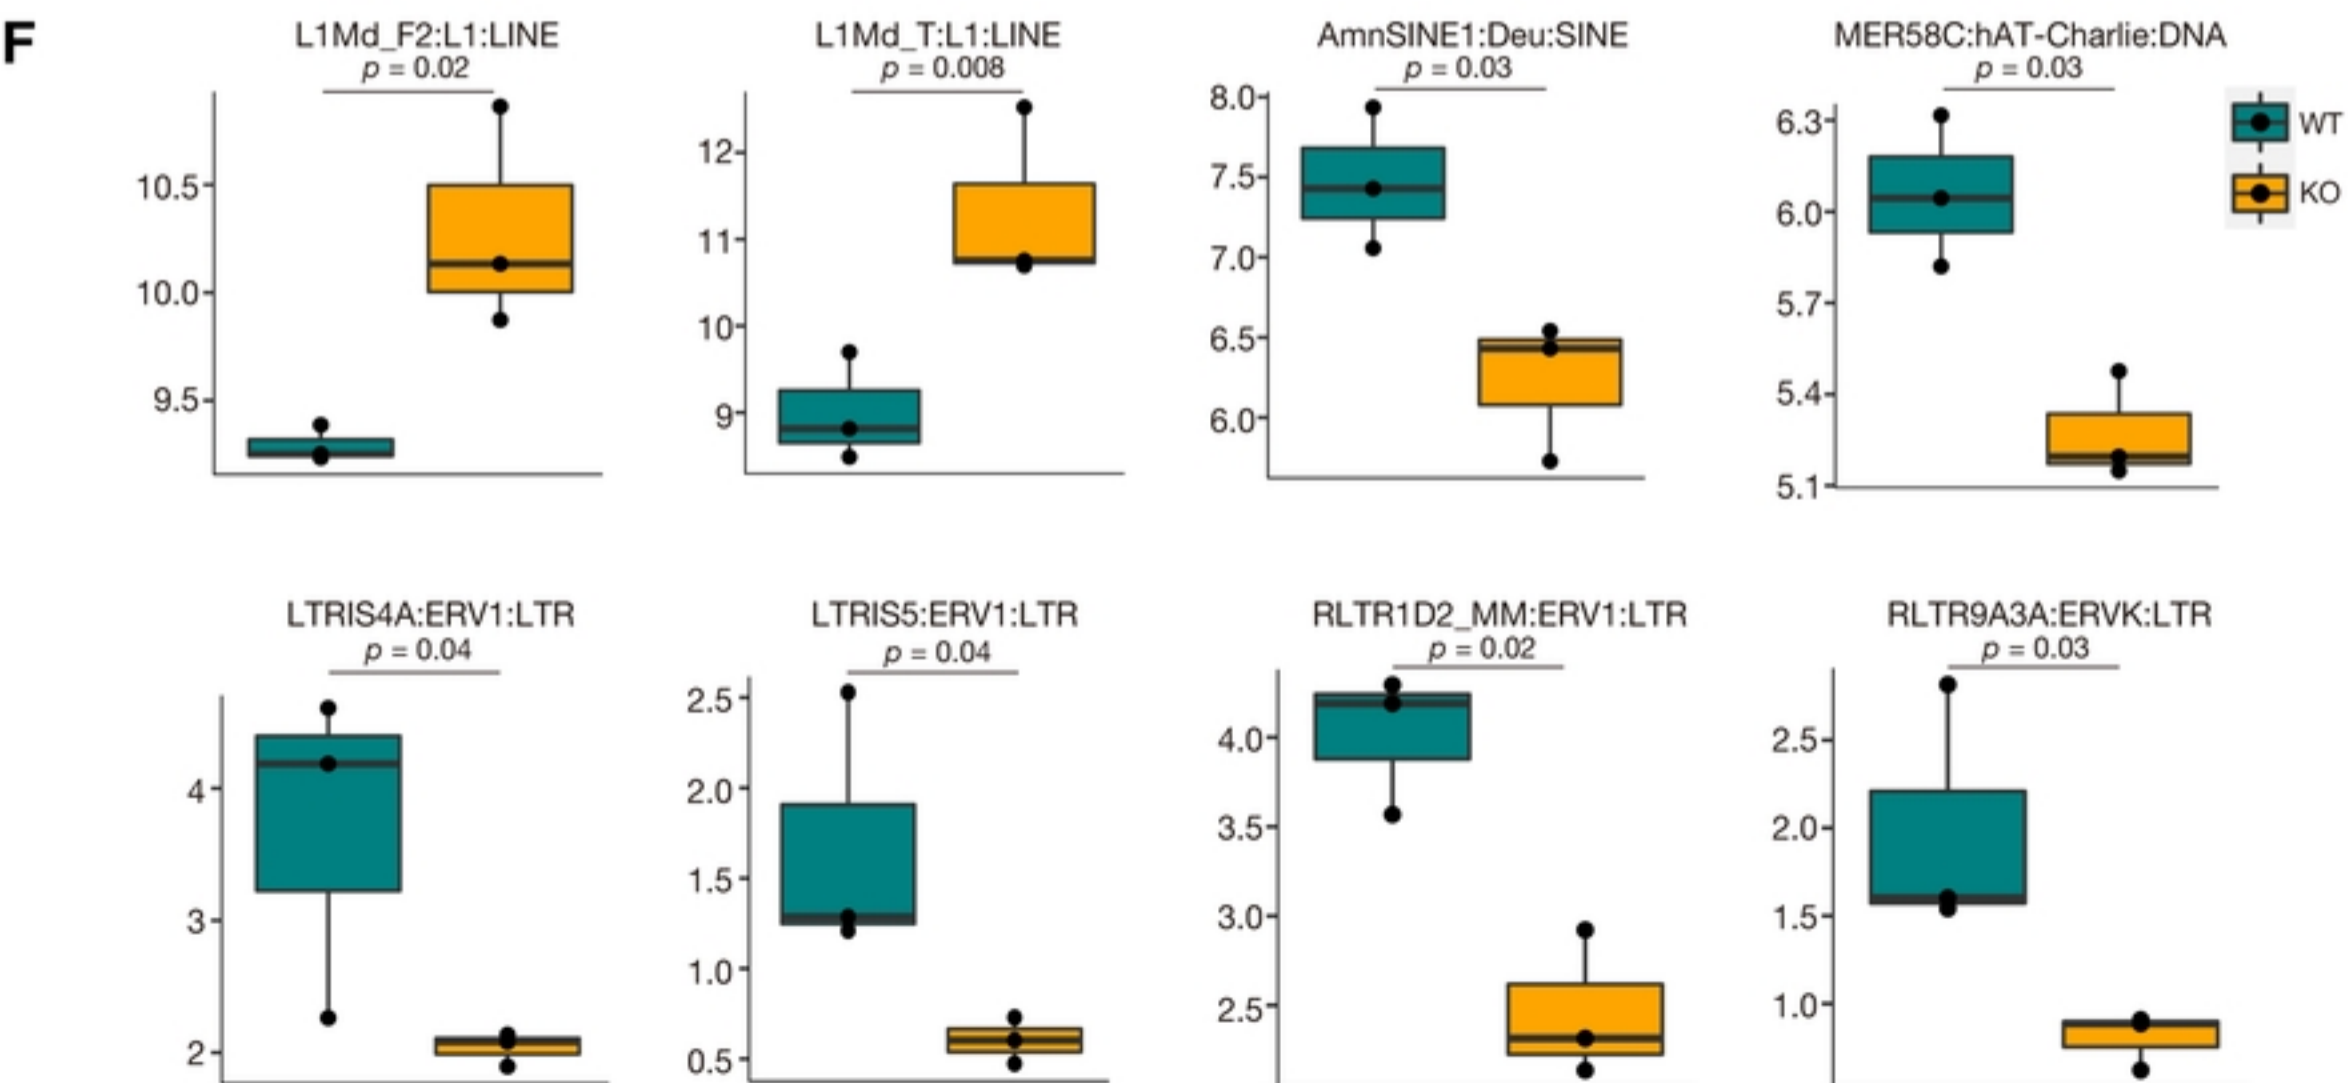

Figure 3

**A**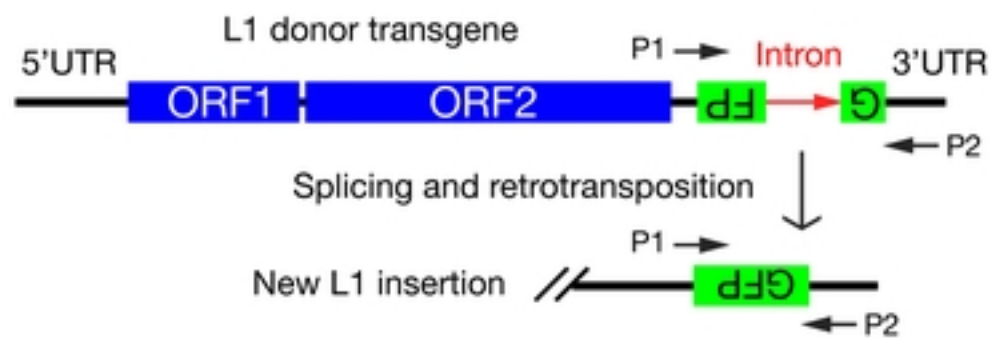**B**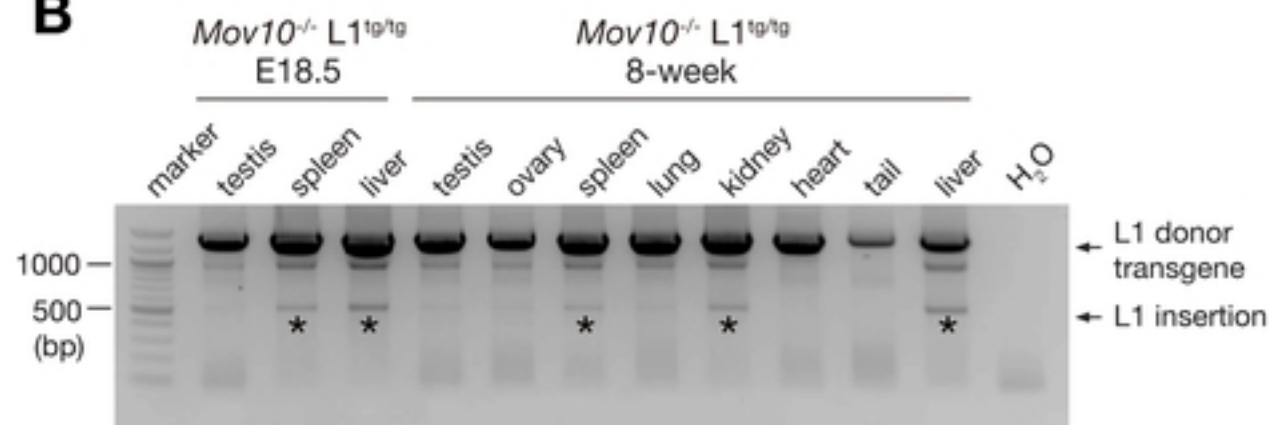**C**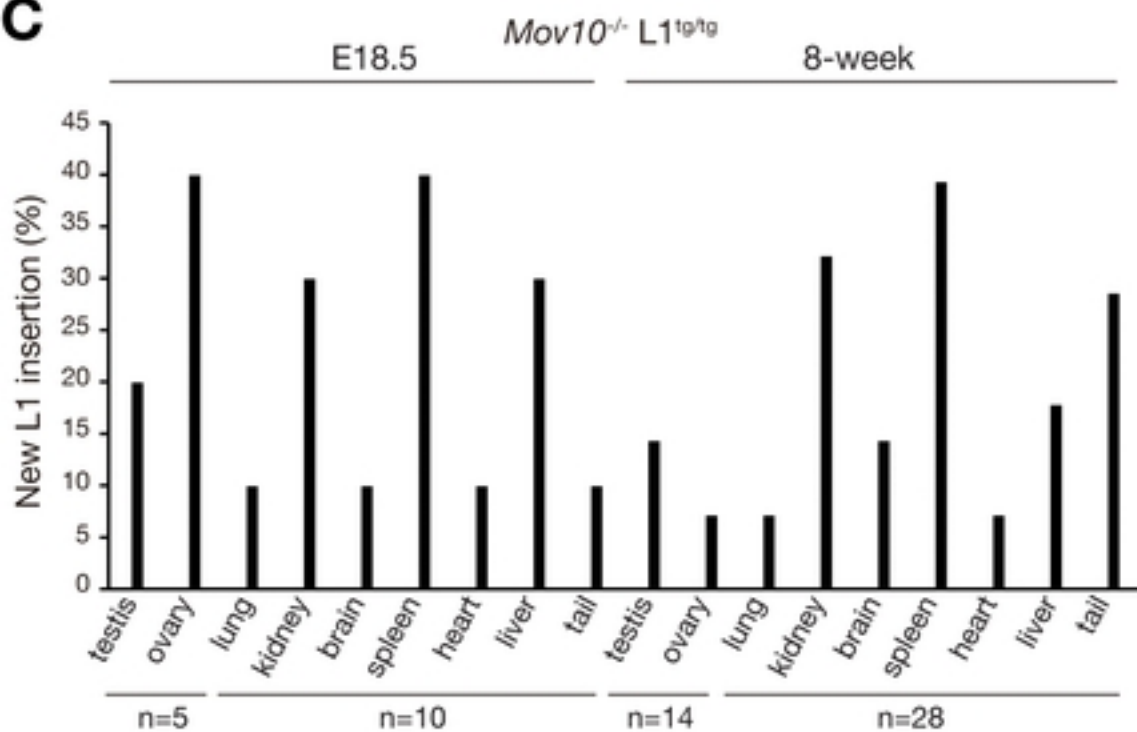**D**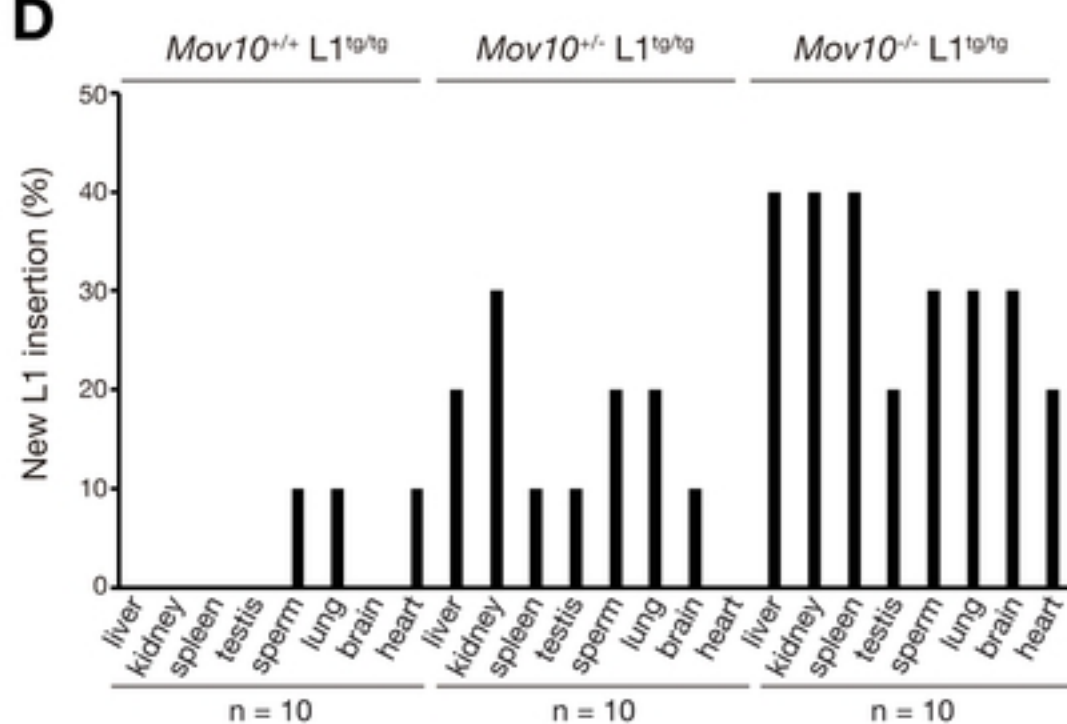**E**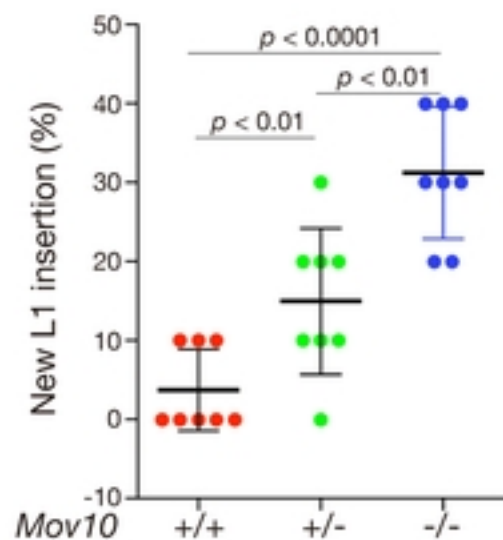**F**

| Father                                        | Mother                                        | Number of pups | Pups with L1 insertion in tail | L1 insertion frequency (%) |
|-----------------------------------------------|-----------------------------------------------|----------------|--------------------------------|----------------------------|
| <i>Mov10<sup>-/-</sup> L1<sup>Tg/Tg</sup></i> | <i>Mov10<sup>-/-</sup> L1<sup>Tg/Tg</sup></i> | 101            | 11                             | 10.9                       |
| <i>Mov10<sup>-/-</sup> L1<sup>Tg/Tg</sup></i> | <i>Mov10<sup>+/+</sup></i>                    | 63             | 1                              | 1.6                        |
| <i>Mov10<sup>+/+</sup></i>                    | <i>Mov10<sup>-/-</sup> L1<sup>Tg/Tg</sup></i> | 99             | 7                              | 7.1                        |

Figure 4

**A**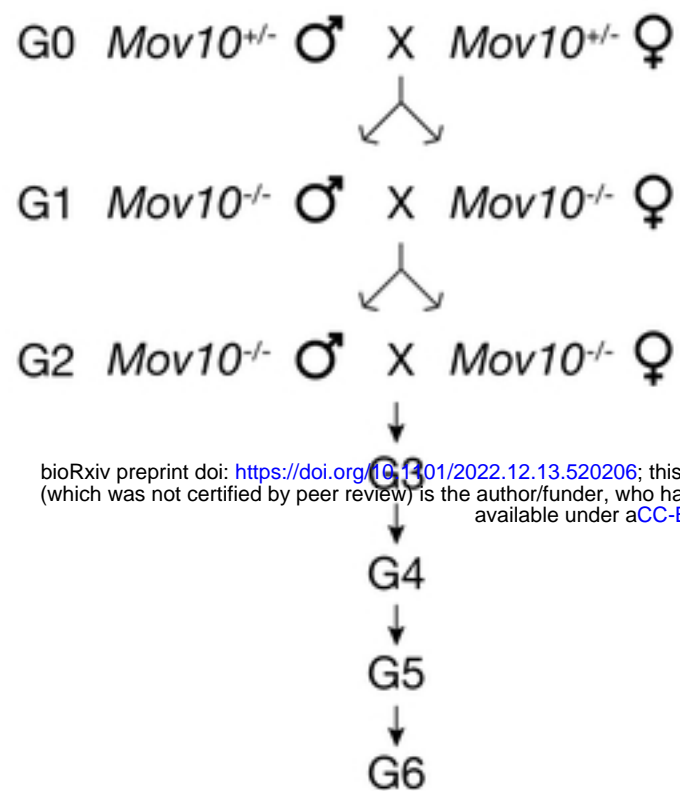

bioRxiv preprint doi: <https://doi.org/10.1101/2022.12.13.520206>; this version posted December 14, 2022. The copyright holder for this preprint (which was not certified by peer review) is the author/funder, who has granted bioRxiv a license to display the preprint in perpetuity. It is made available under aCC-BY 4.0 International license.

**B**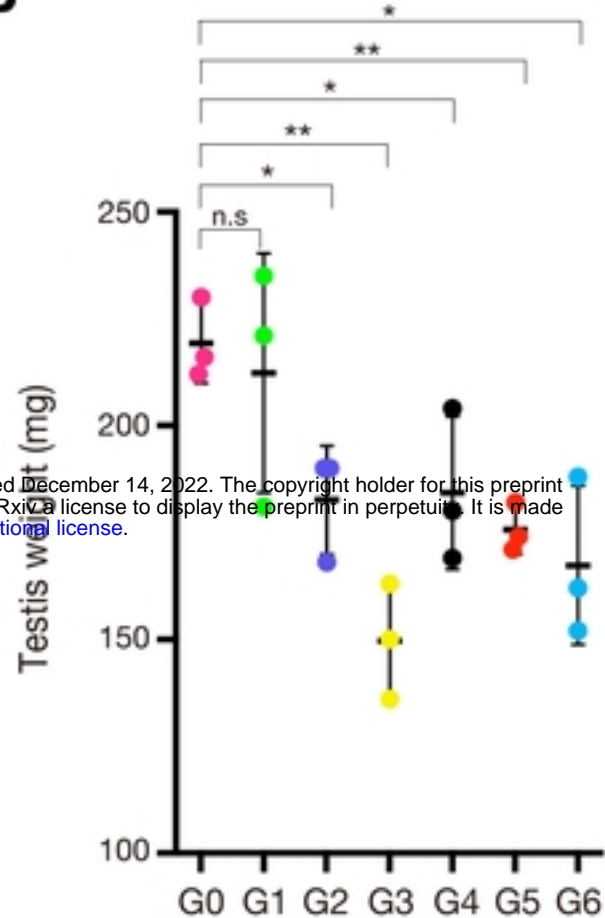**C**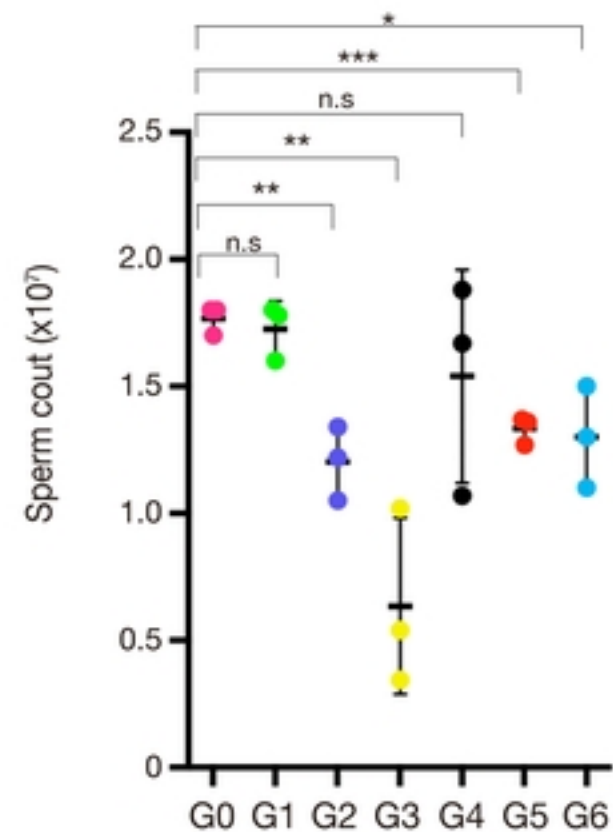**D**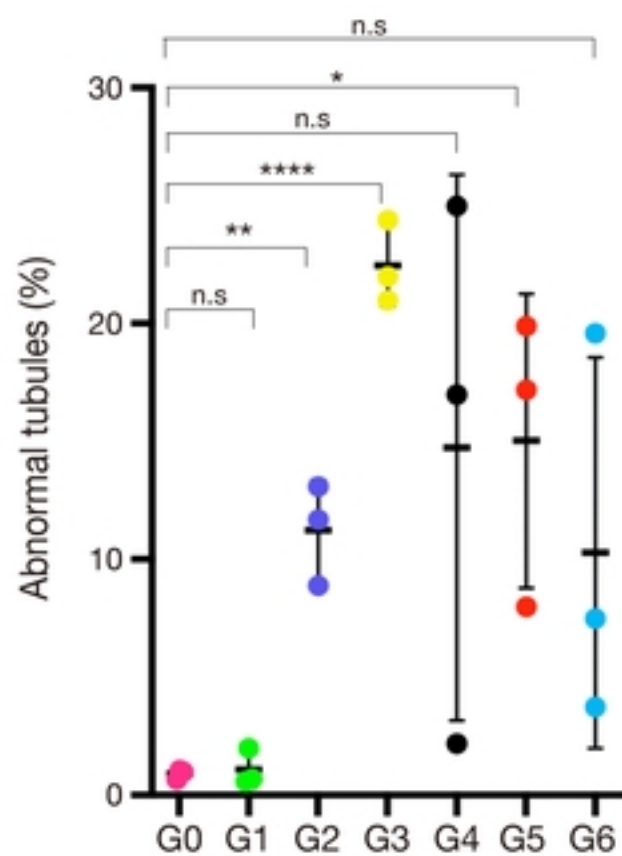**E**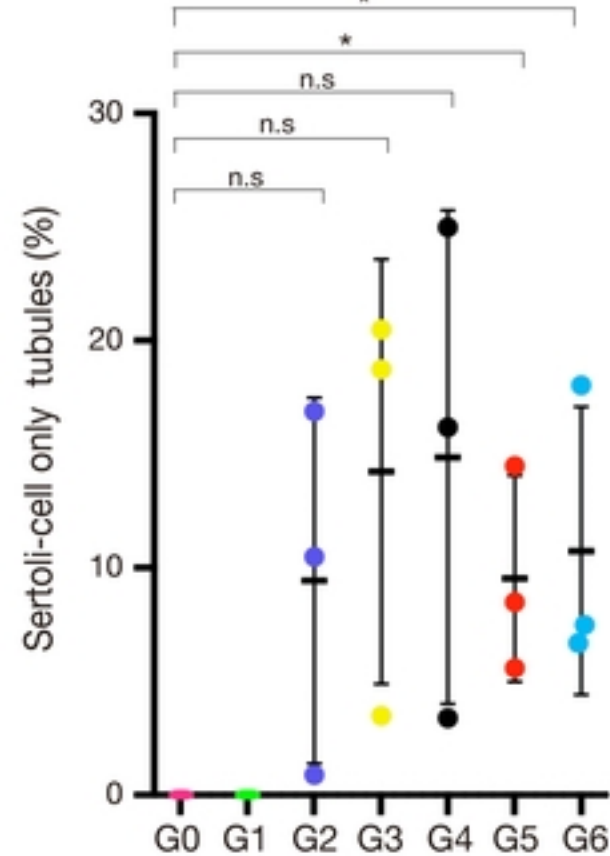**F**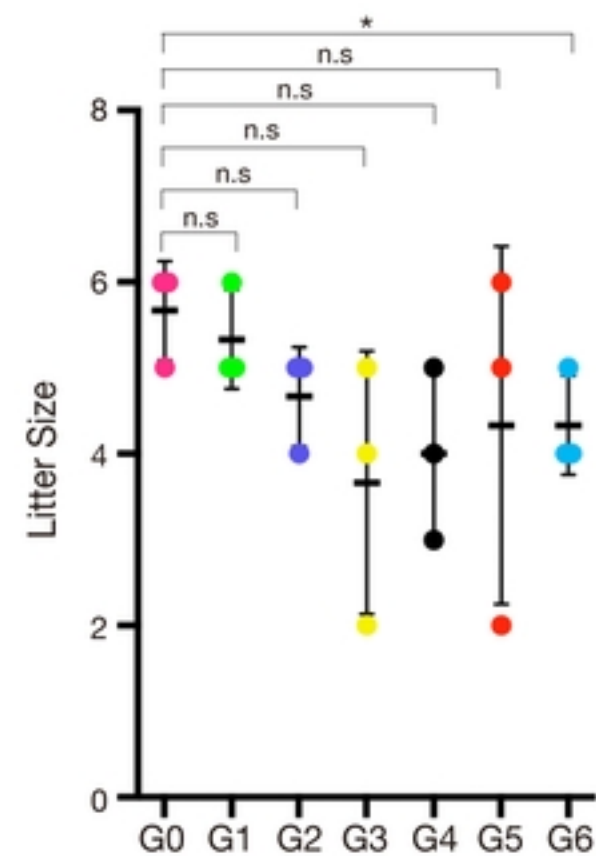**G**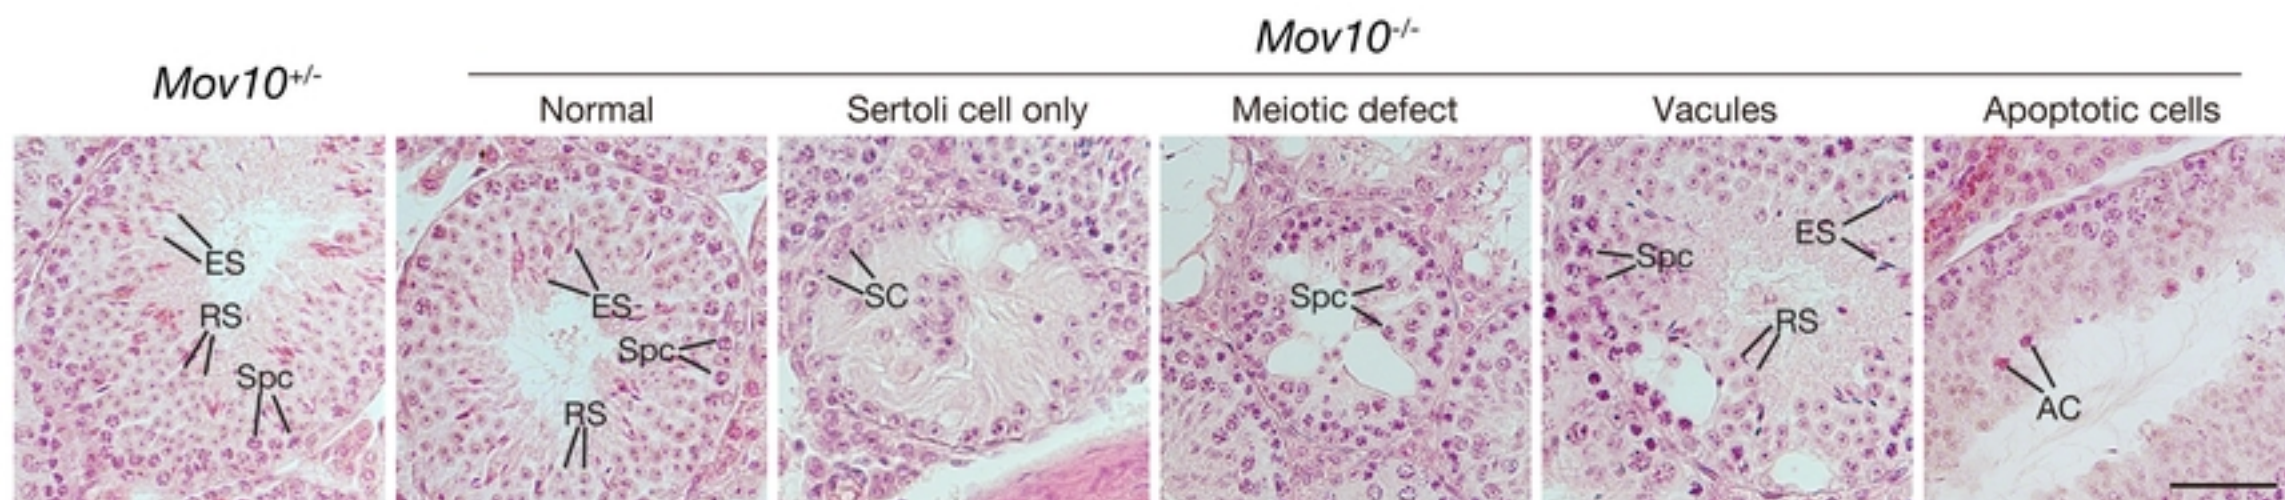

Figure 5

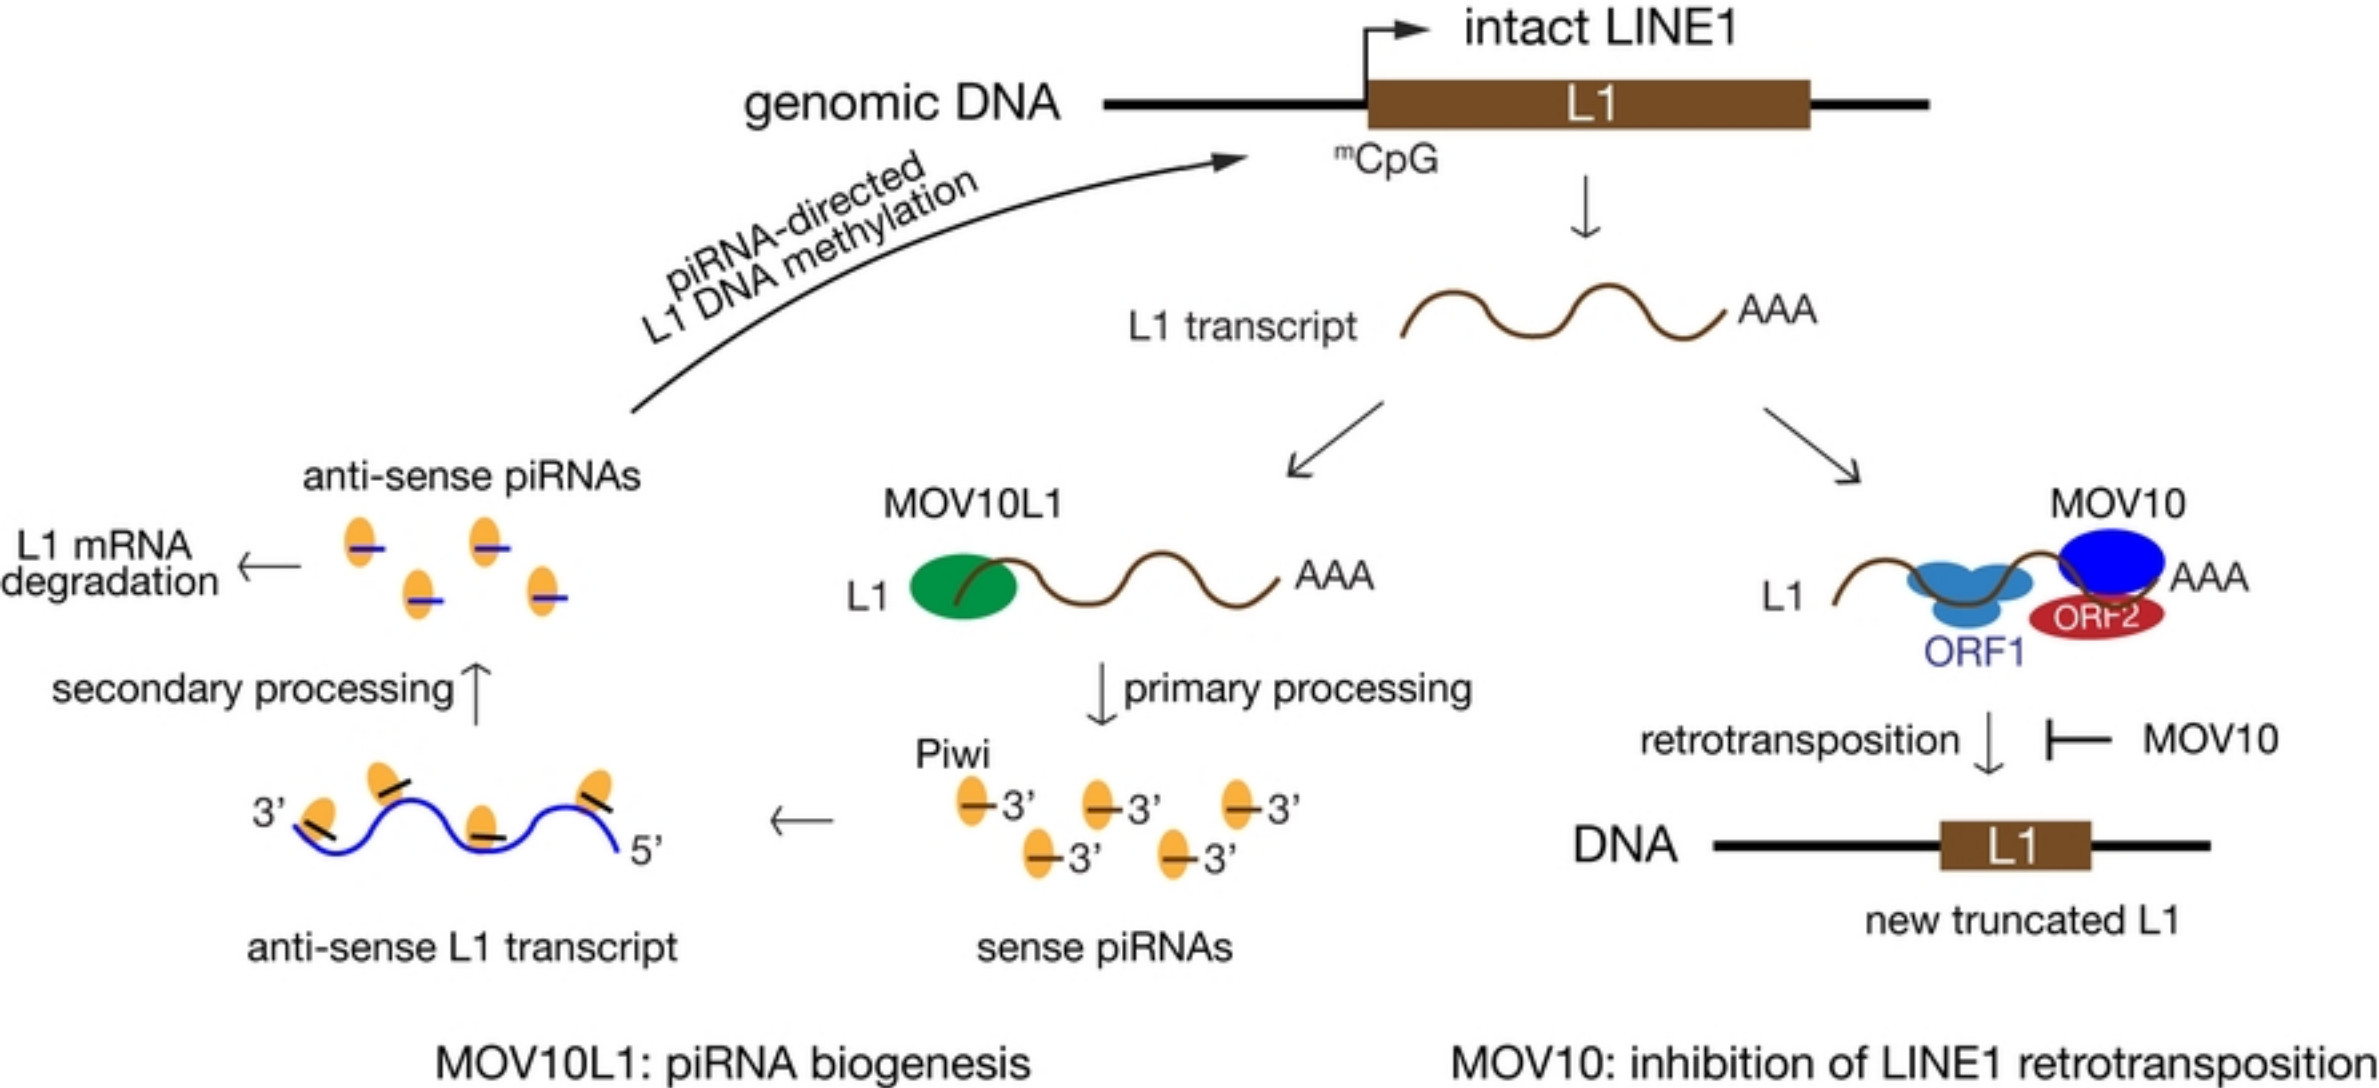

Figure 6
